# Supplementary material
Source: PubMed Central journal article supplement (PMC3293248)

Supporting Information

**Synthesis of Benzisoxazolines**

**by the Coupling of Arynes with Nitrones**

Chun Lu, Anton V. Dubrovskiy, and Richard C. Larock \*

*Department of Chemistry, Iowa State University, Ames, Iowa 50011*

[larock@iastate.edu](mailto:larock@iastate.edu)

|                                                        |        |
|--------------------------------------------------------|--------|
| Table of Contents                                      | S1     |
| Copies of $^1\text{H}$ and $^{13}\text{C}$ NMR spectra | S2-S32 |

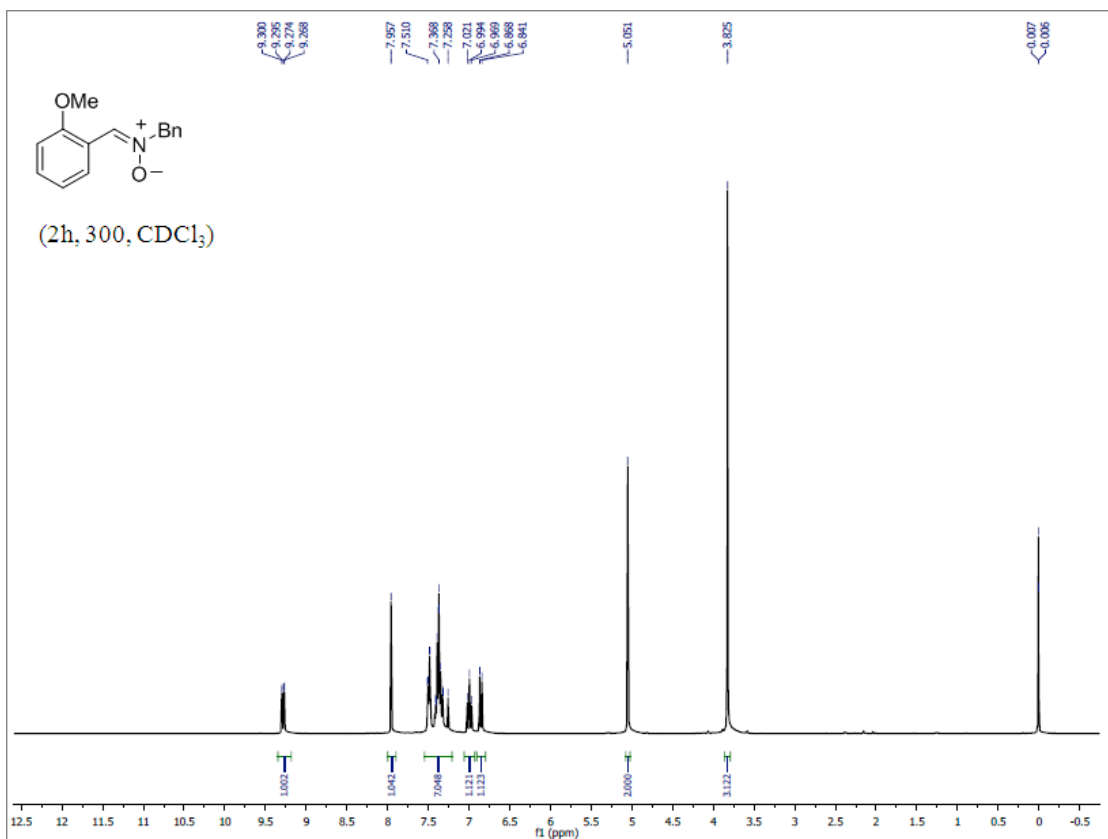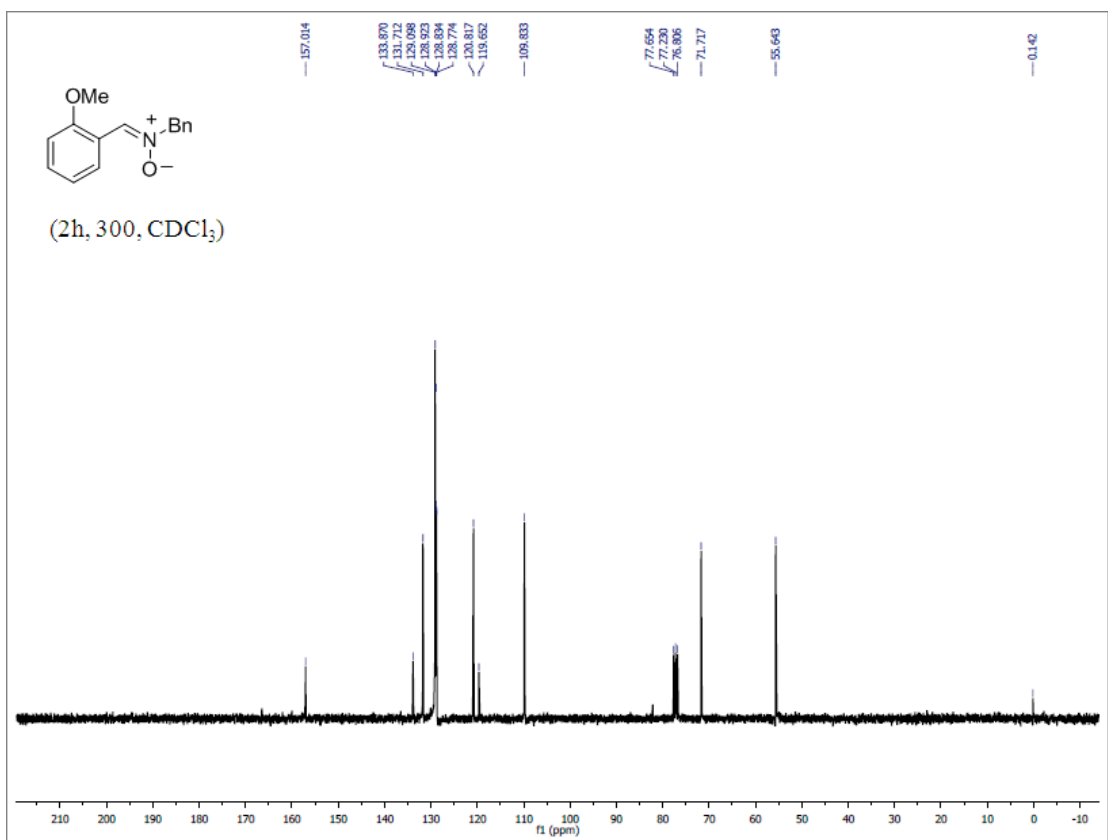

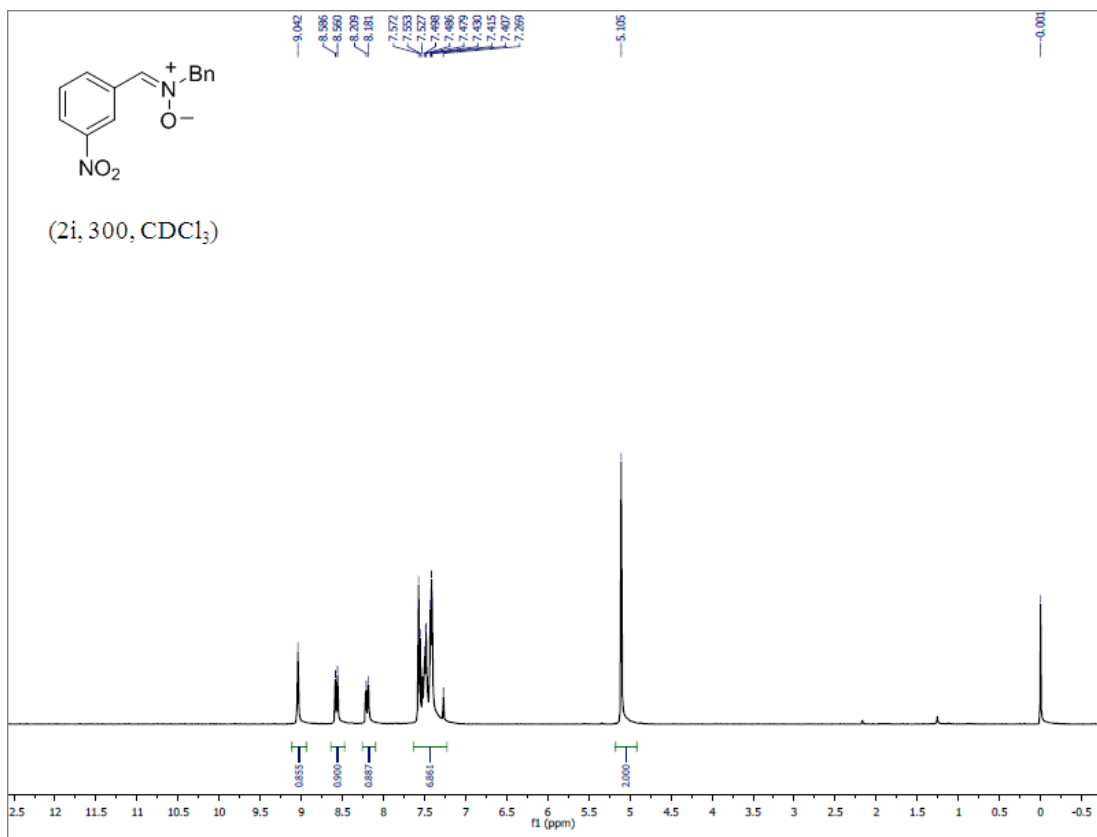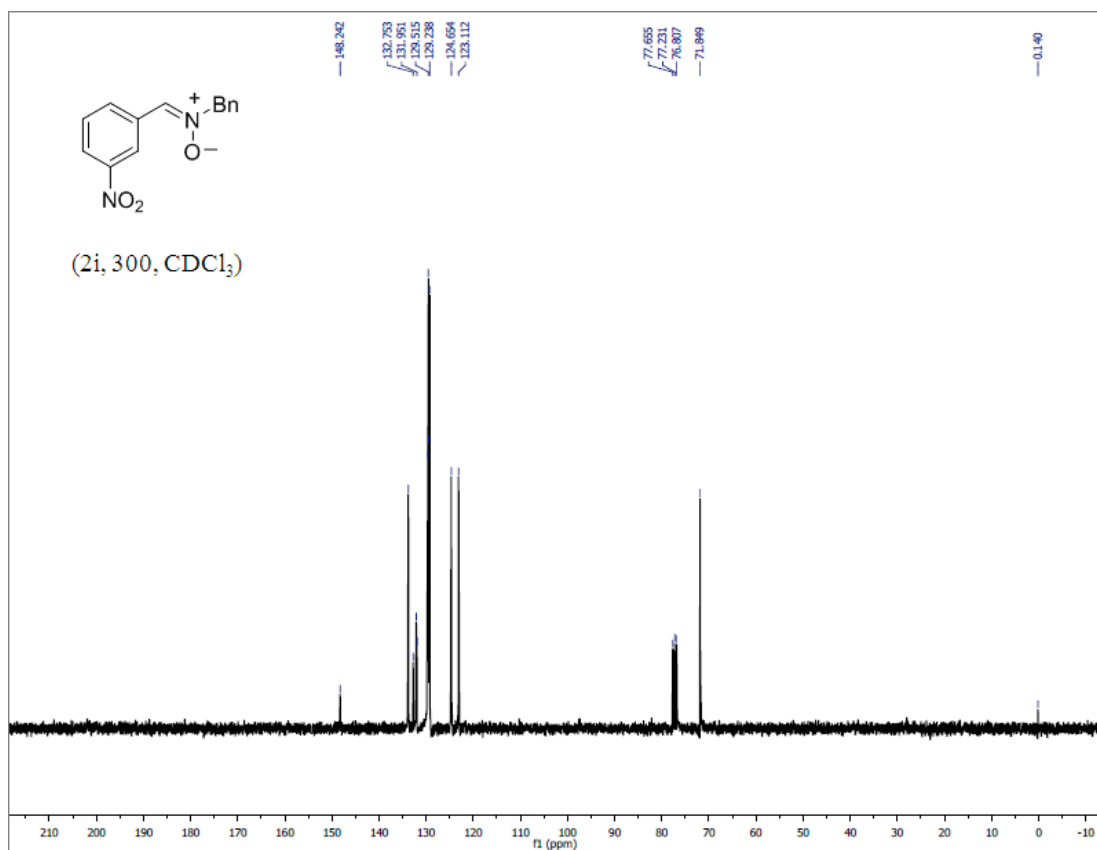

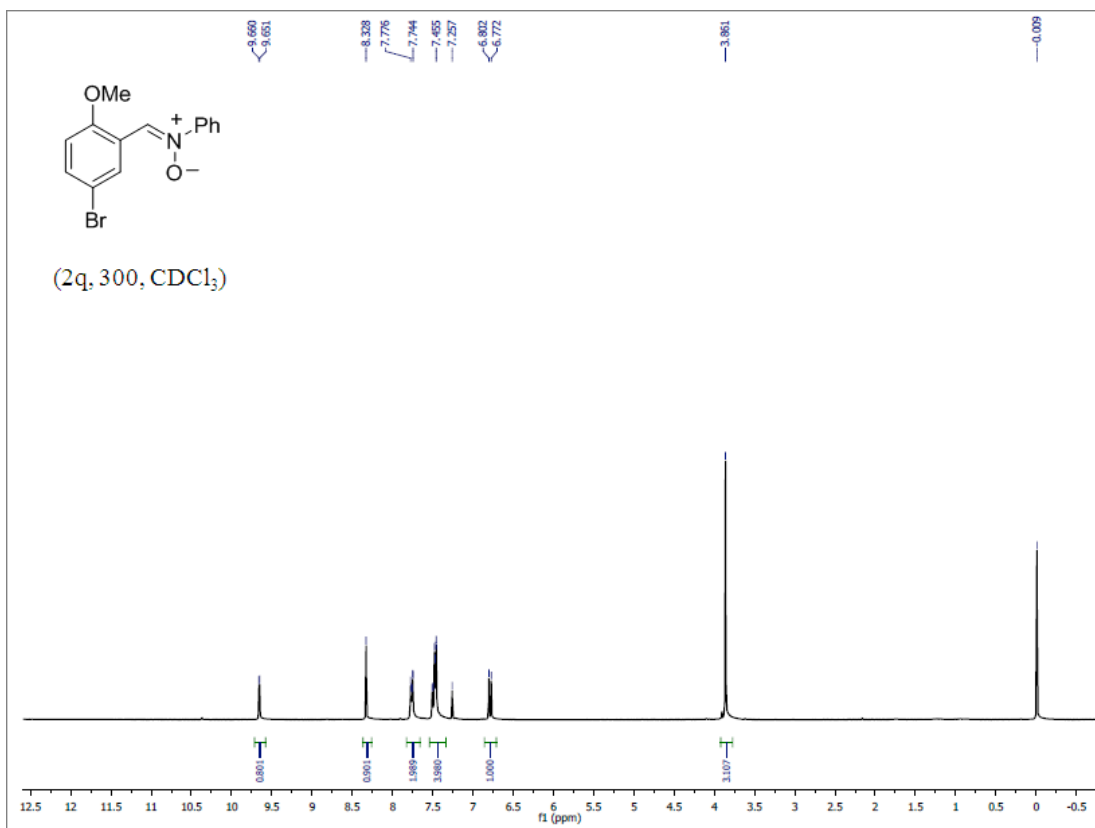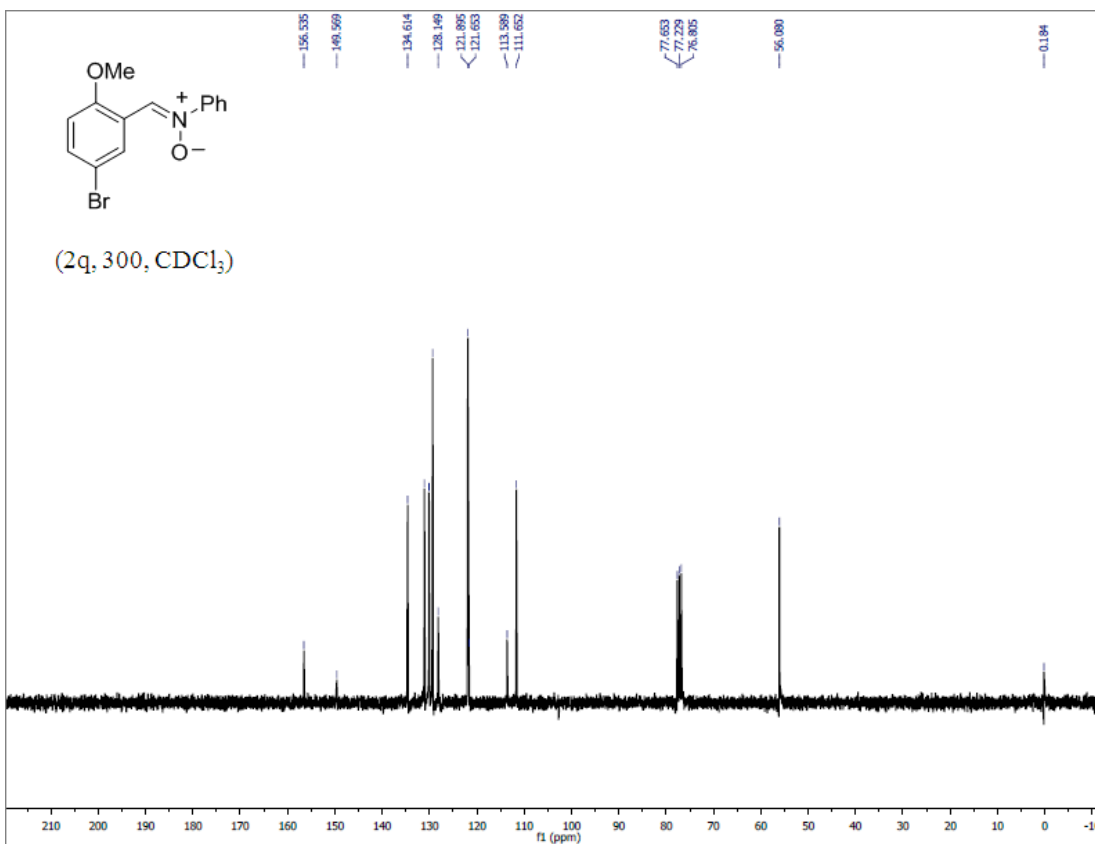

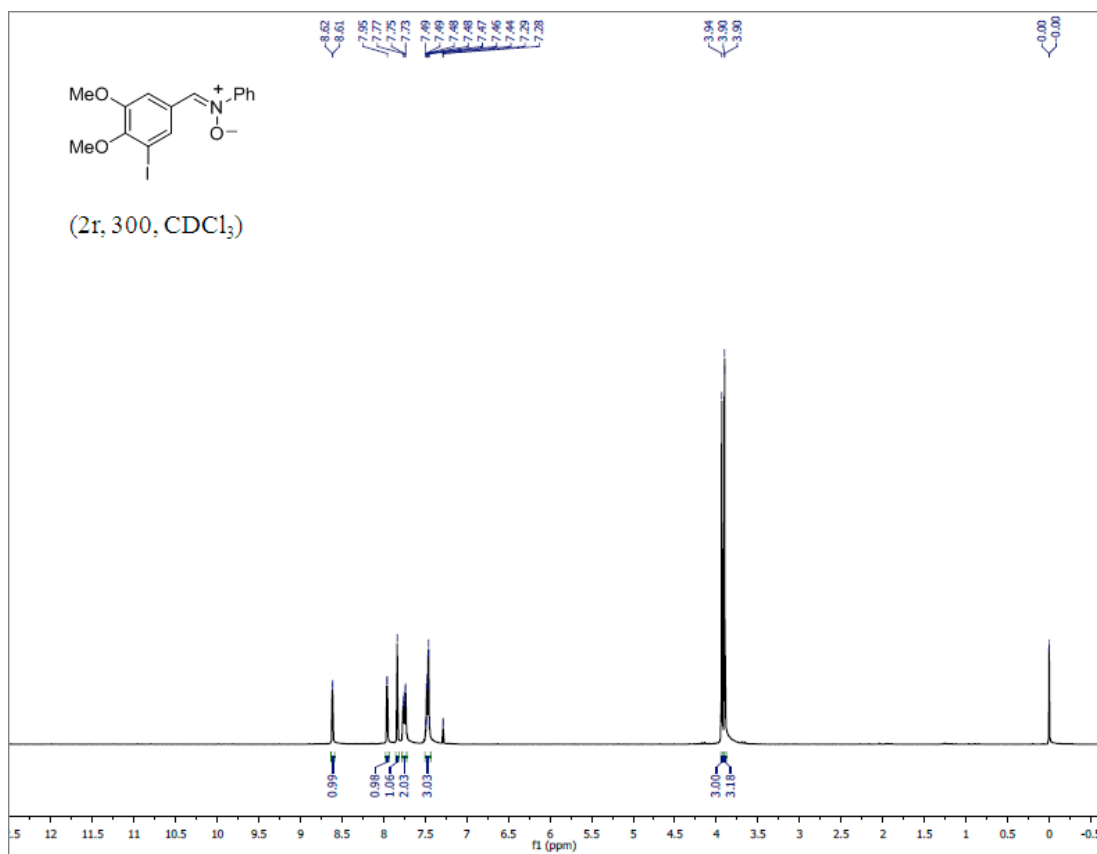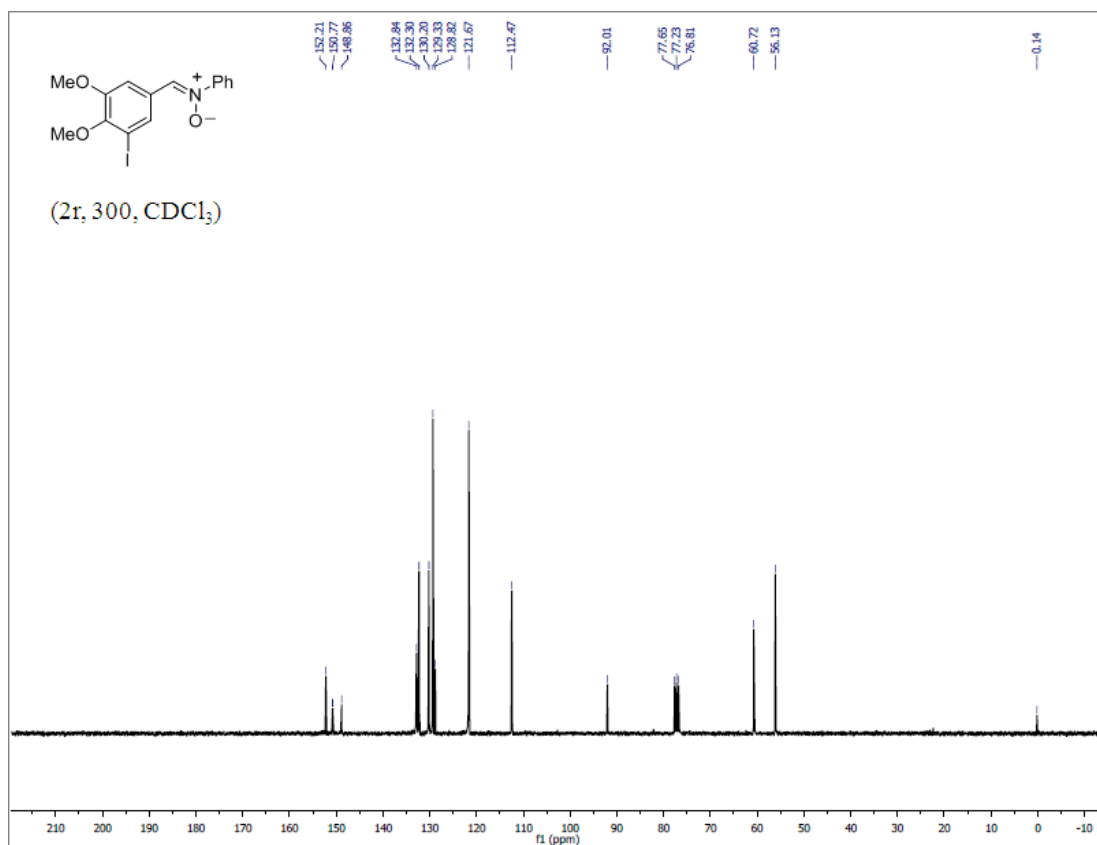

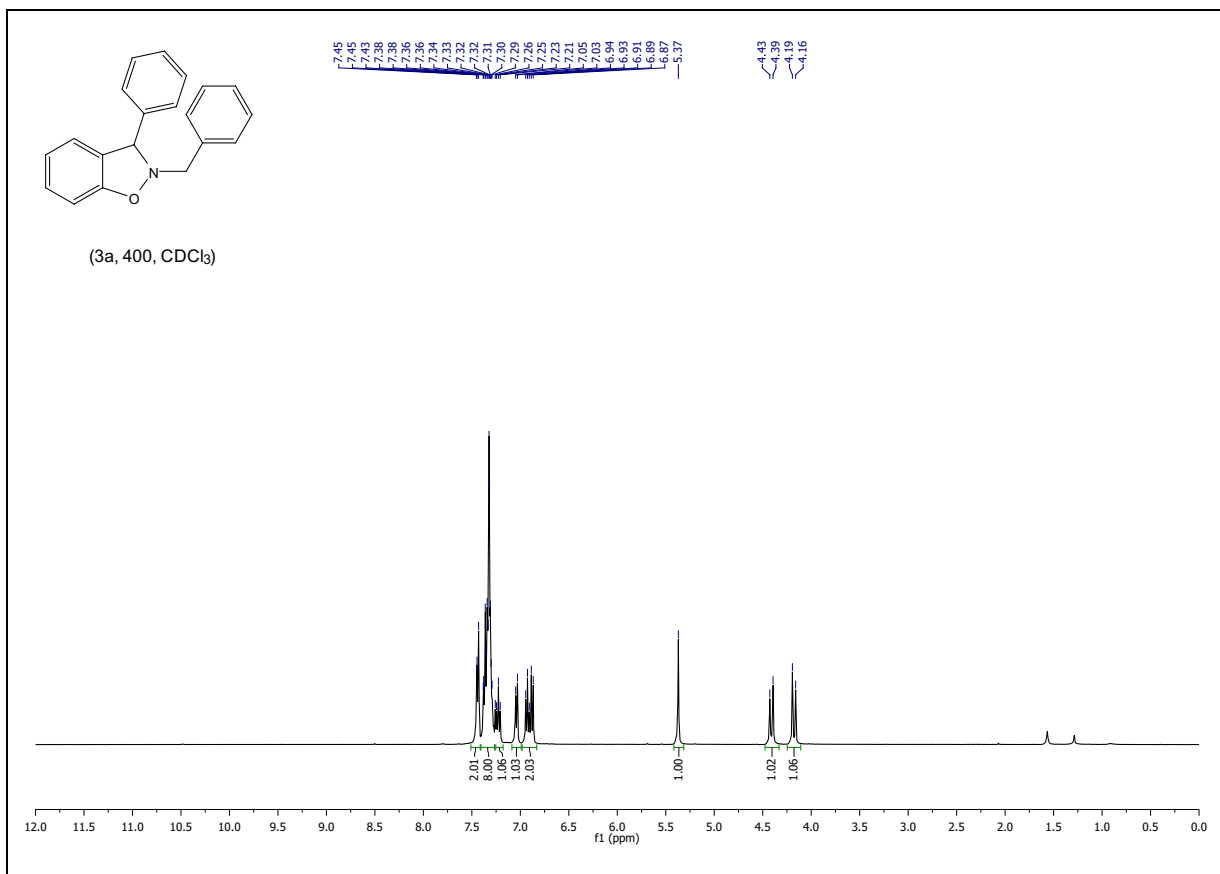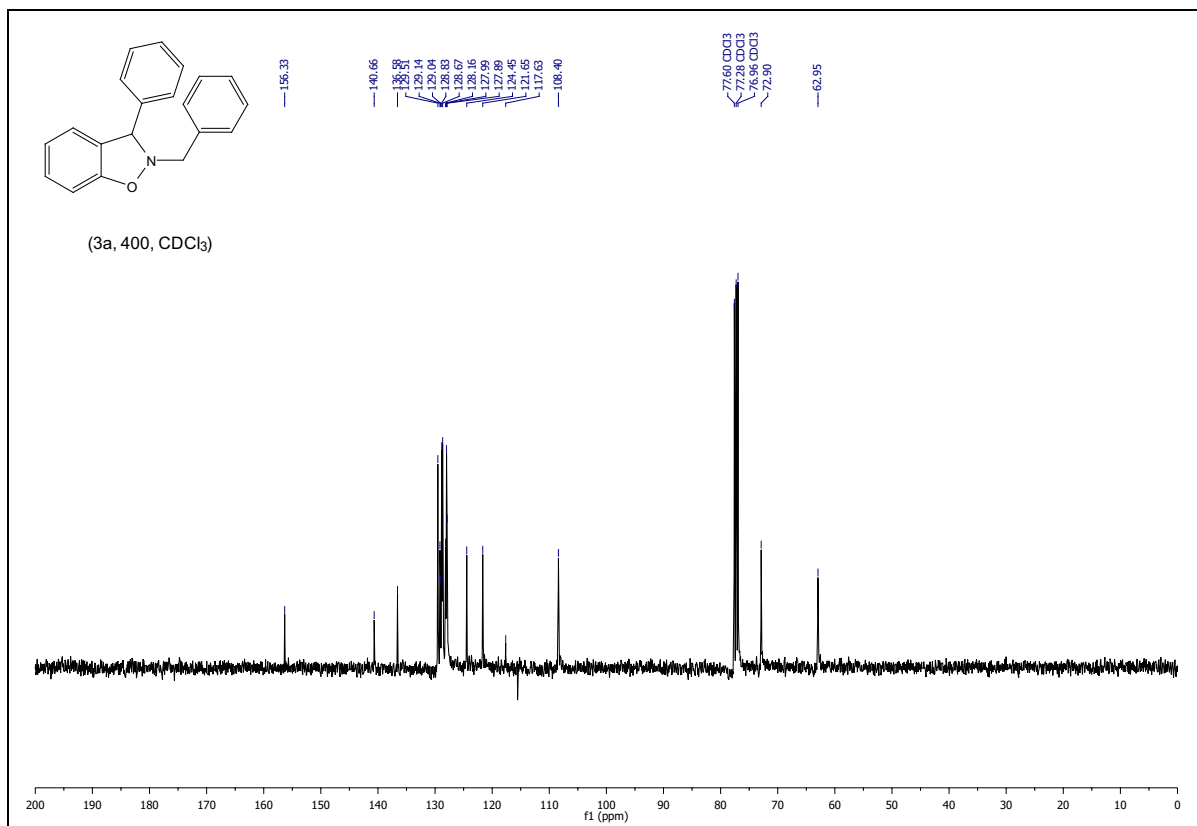

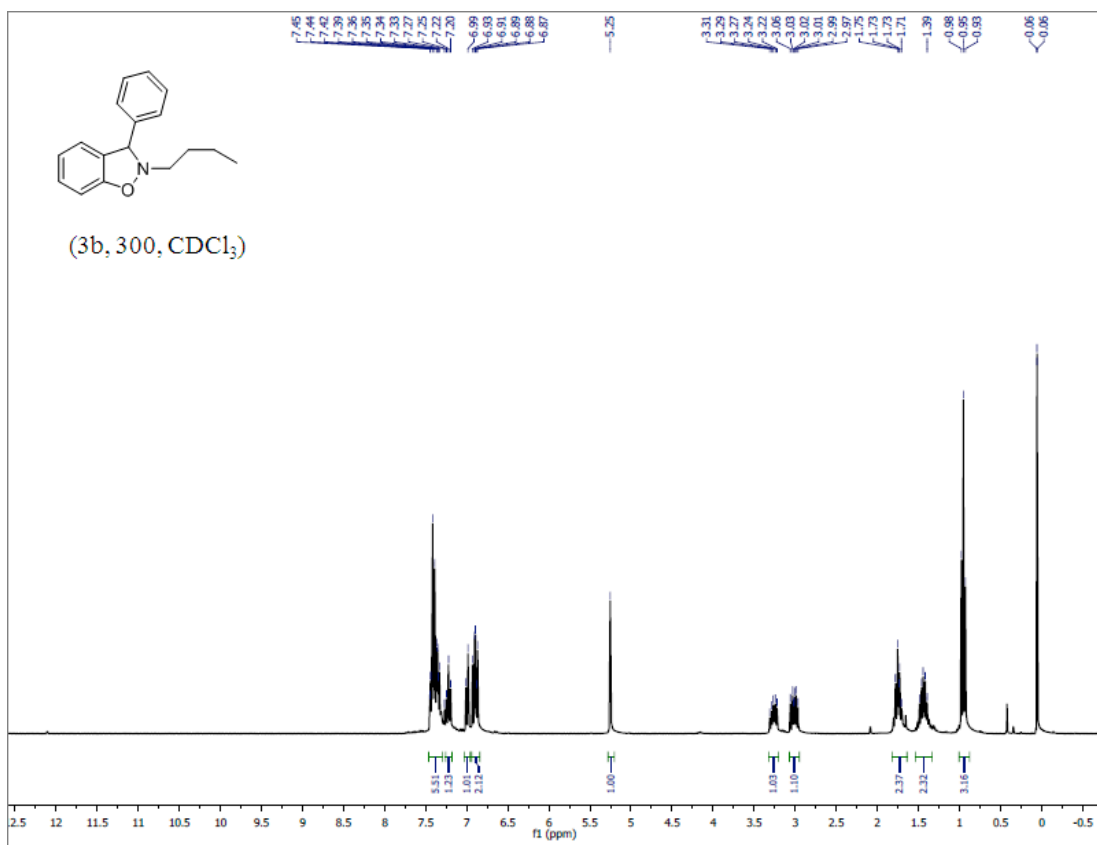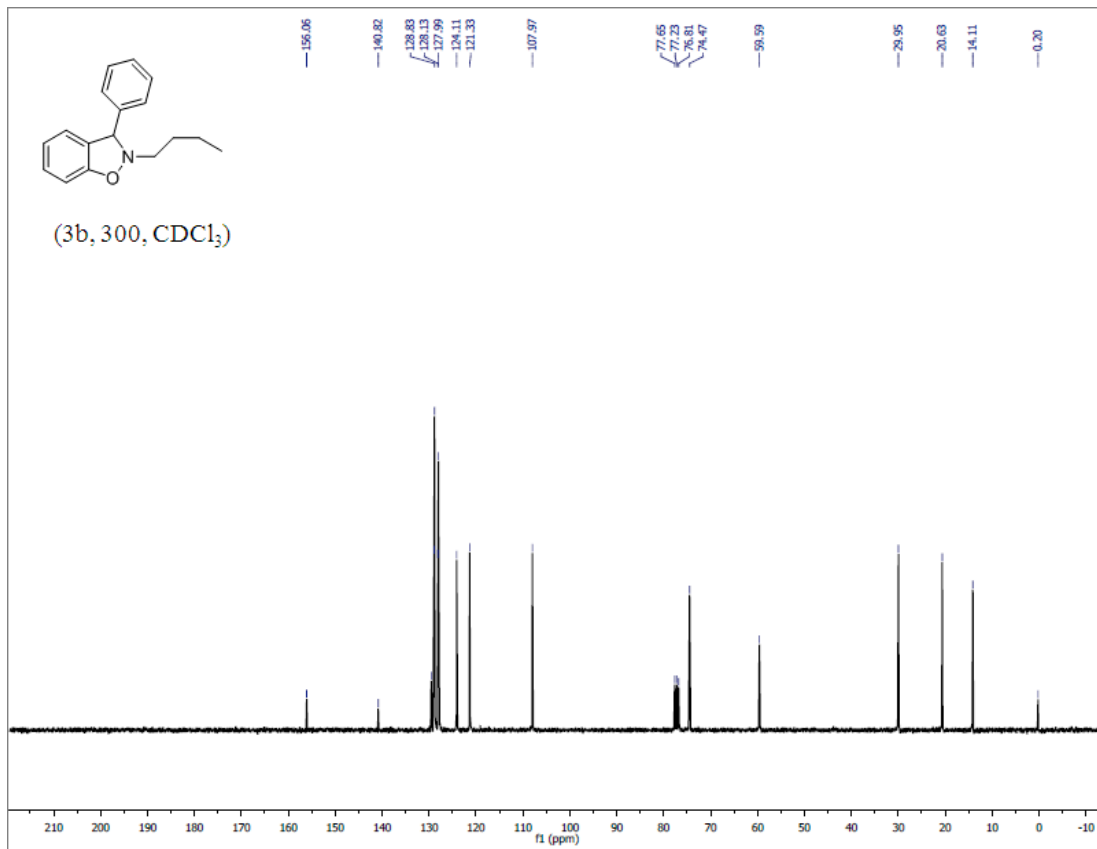

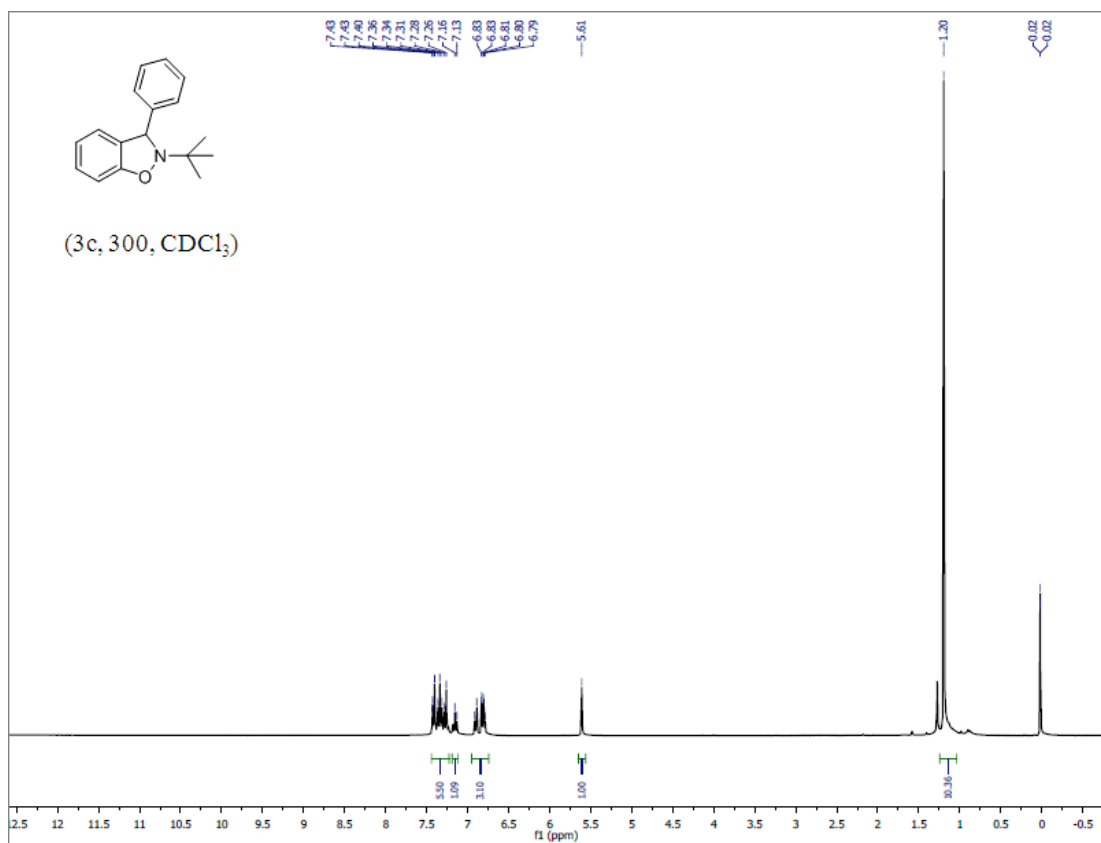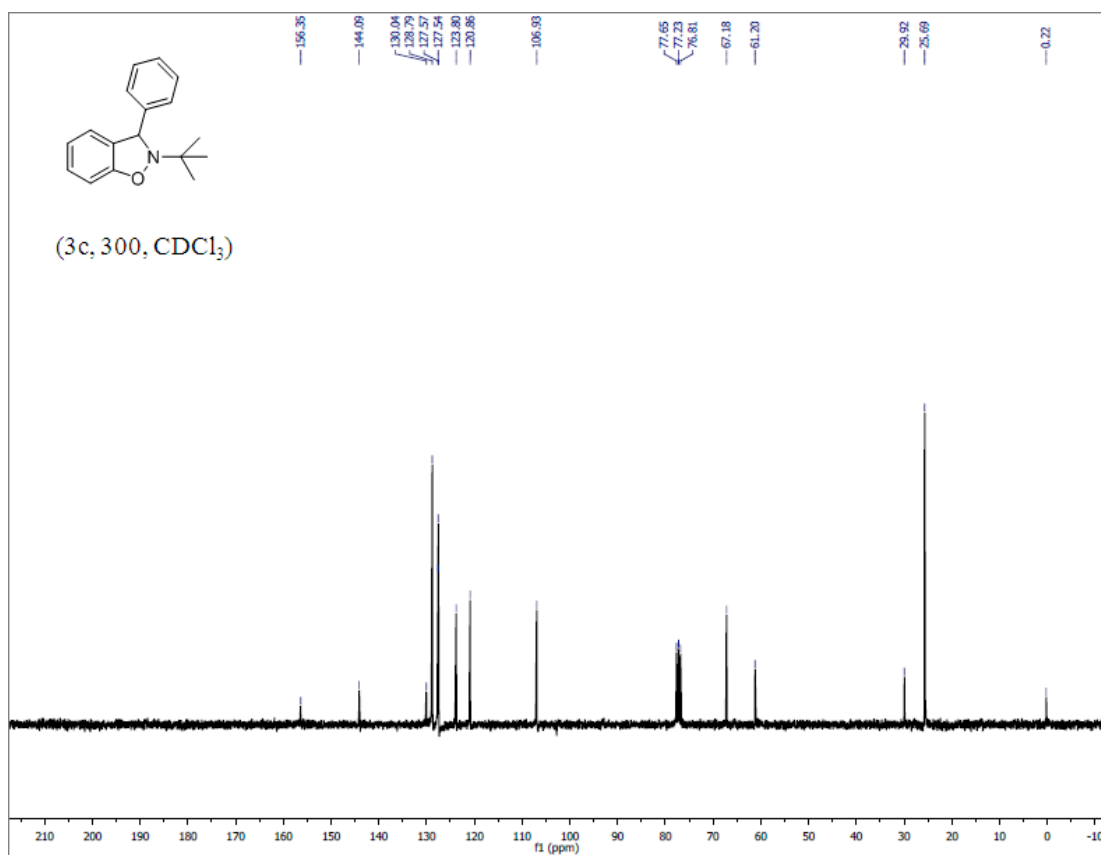



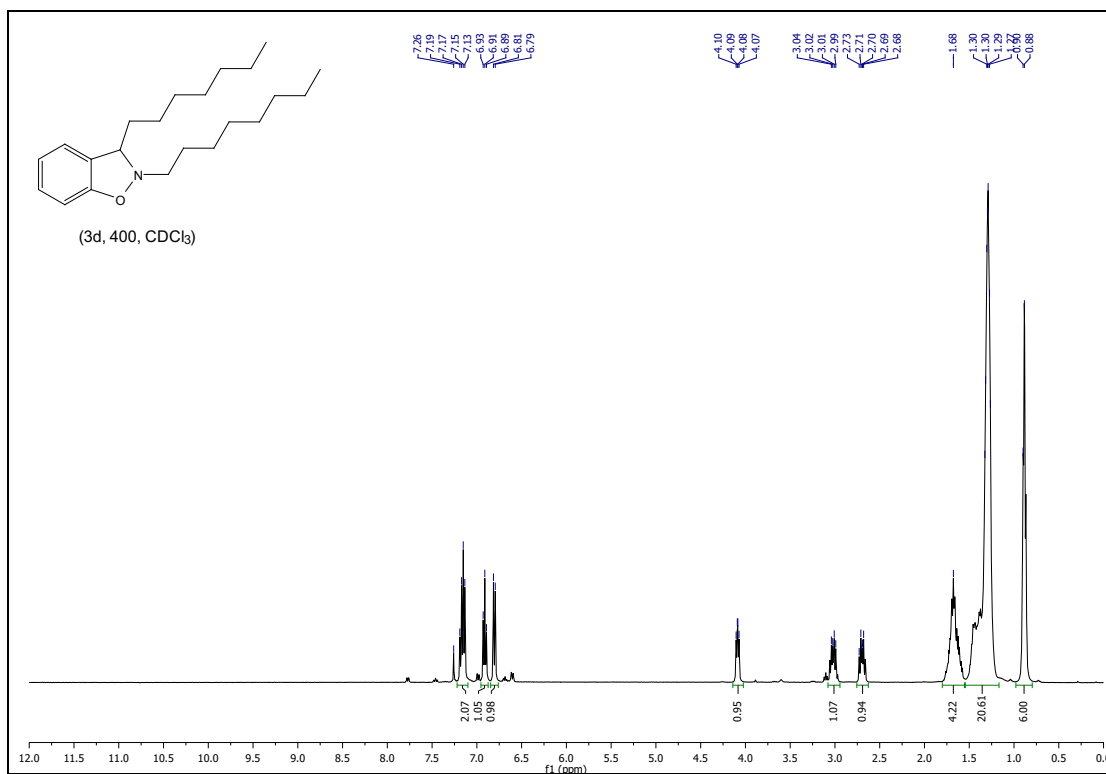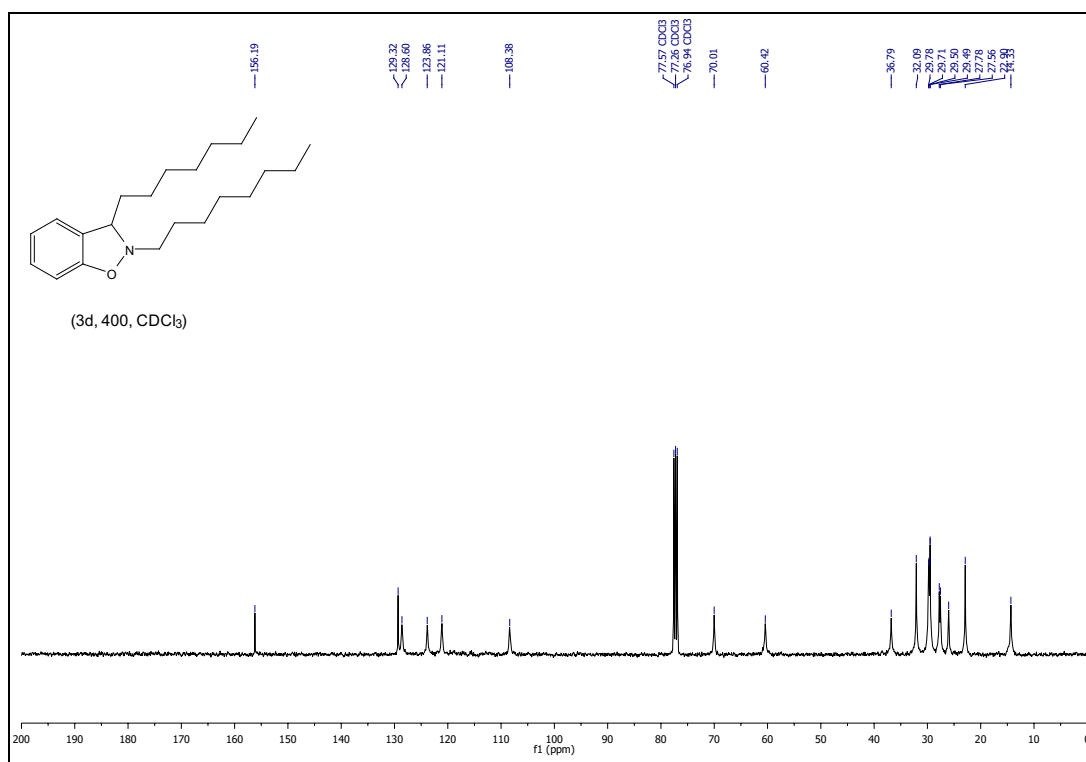

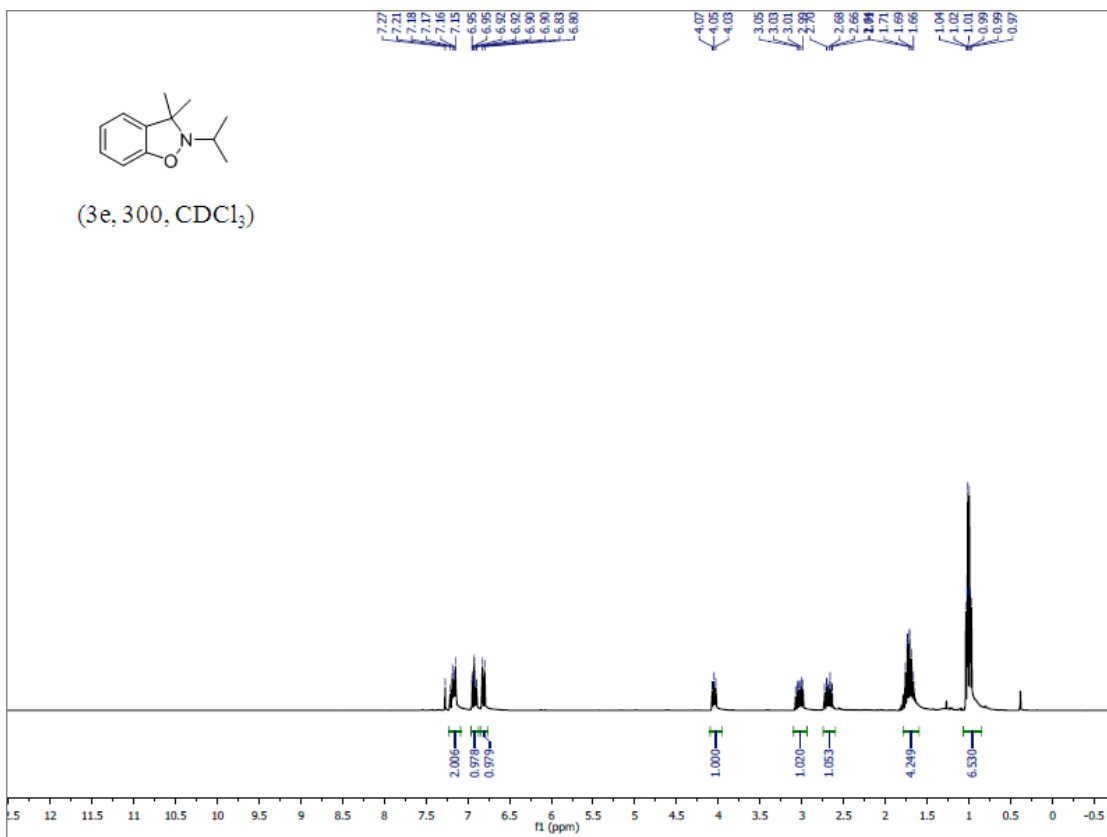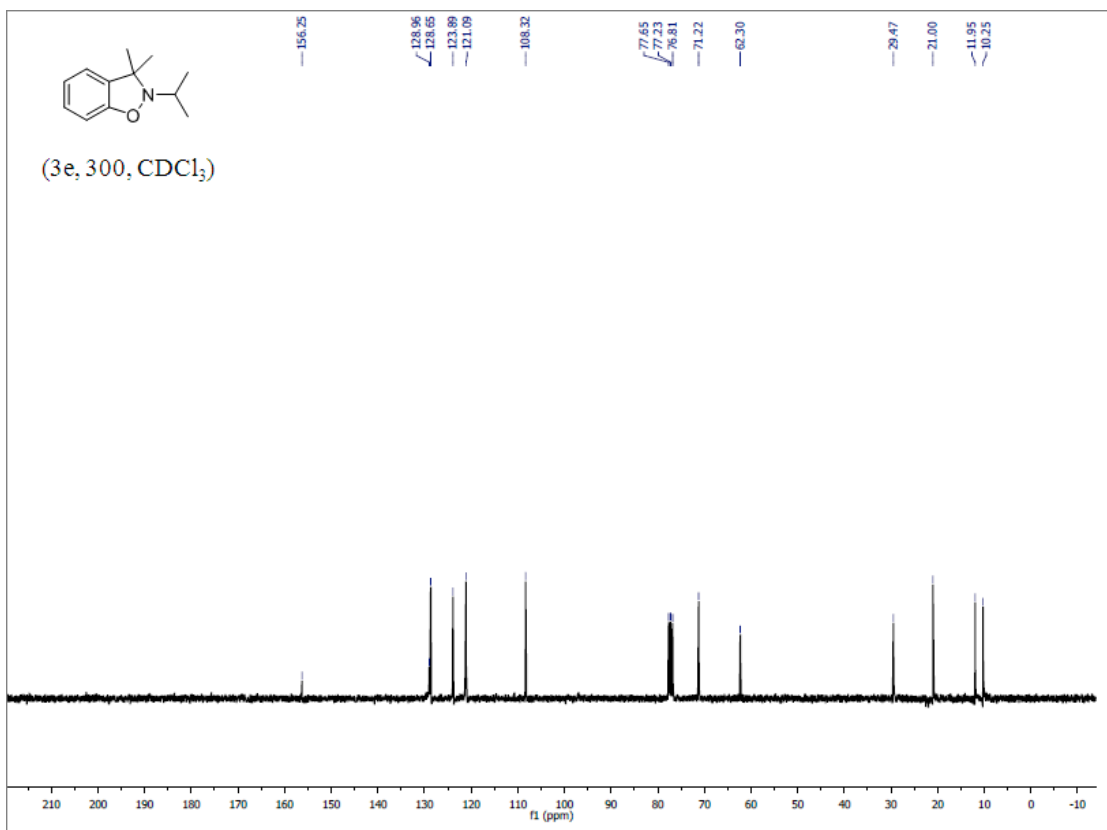

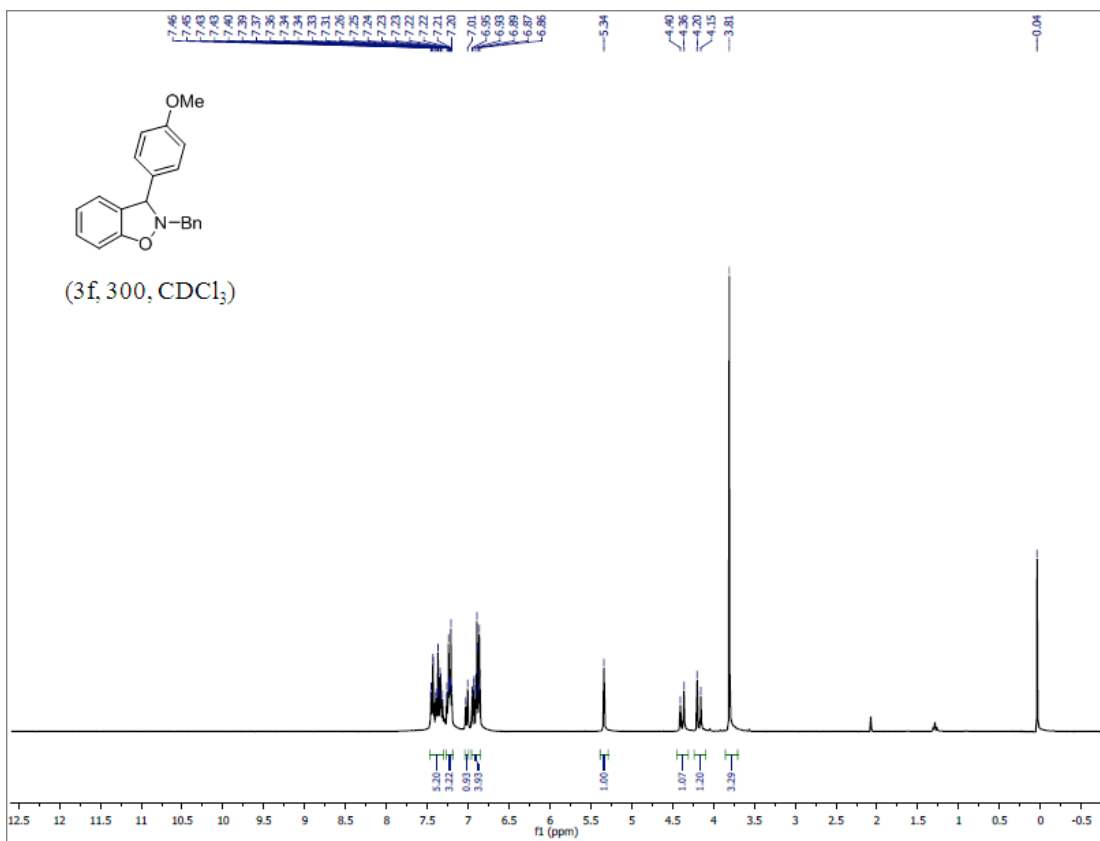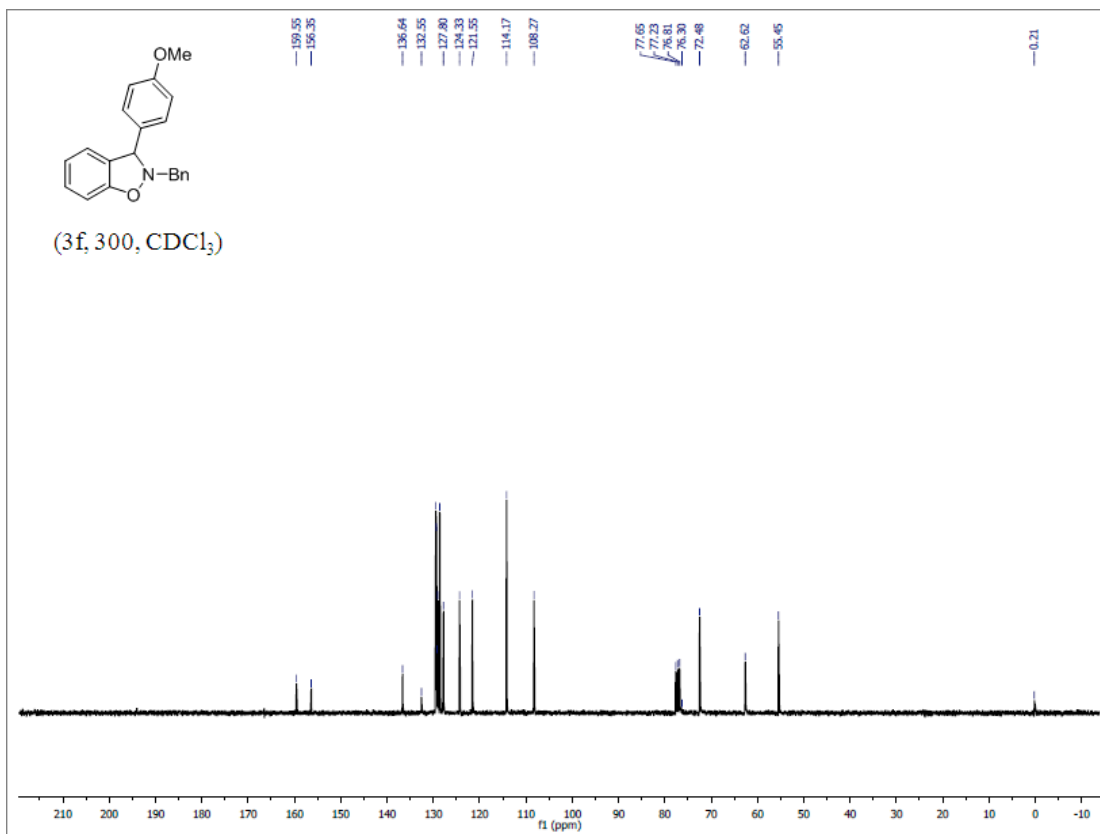

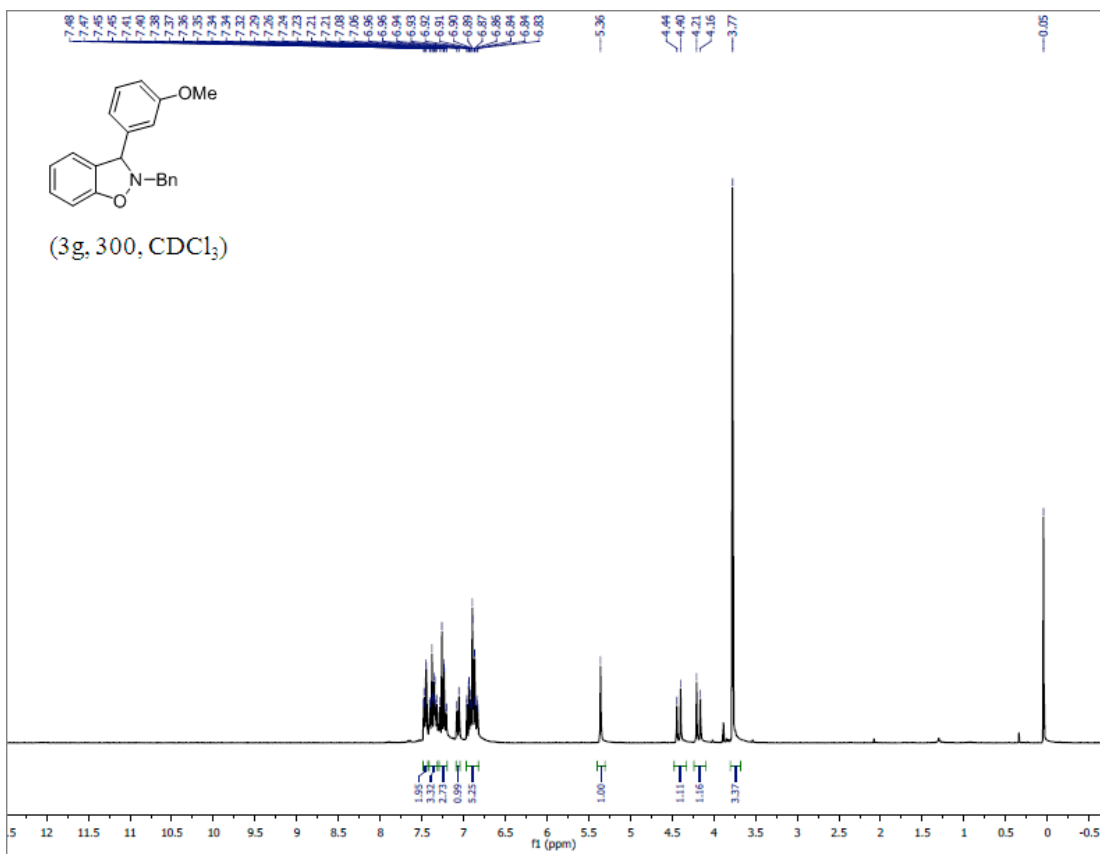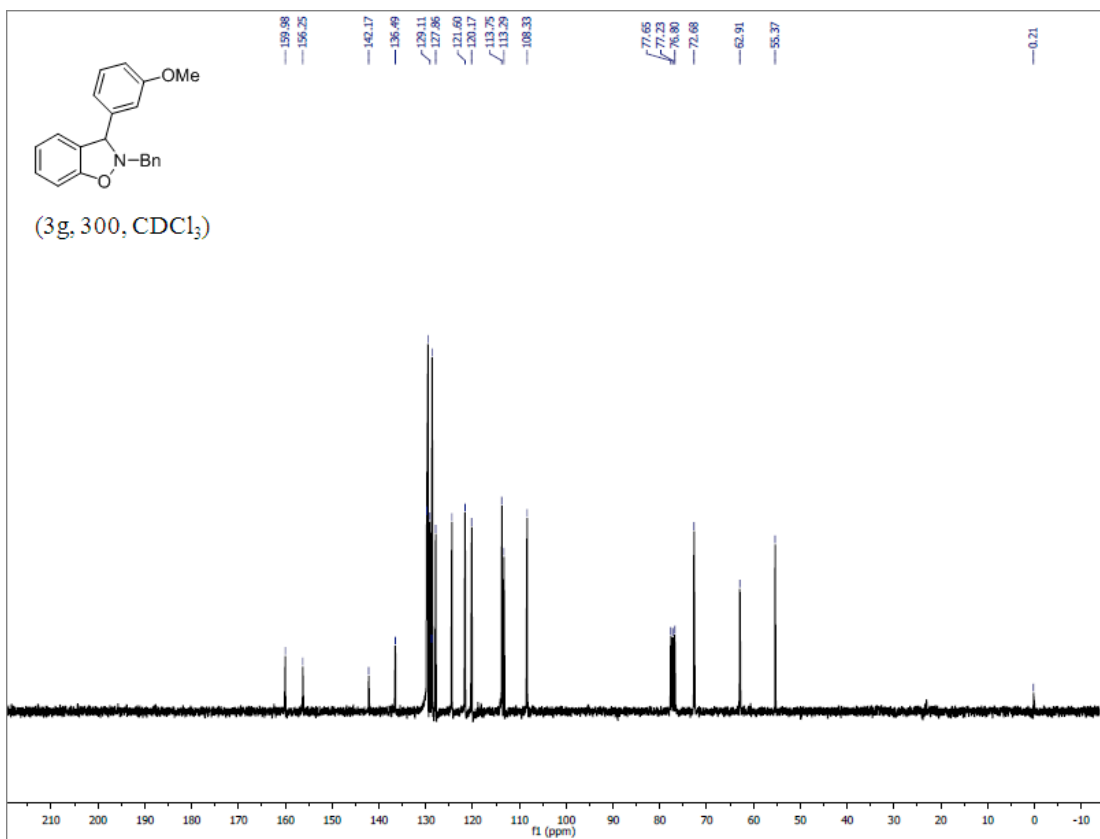

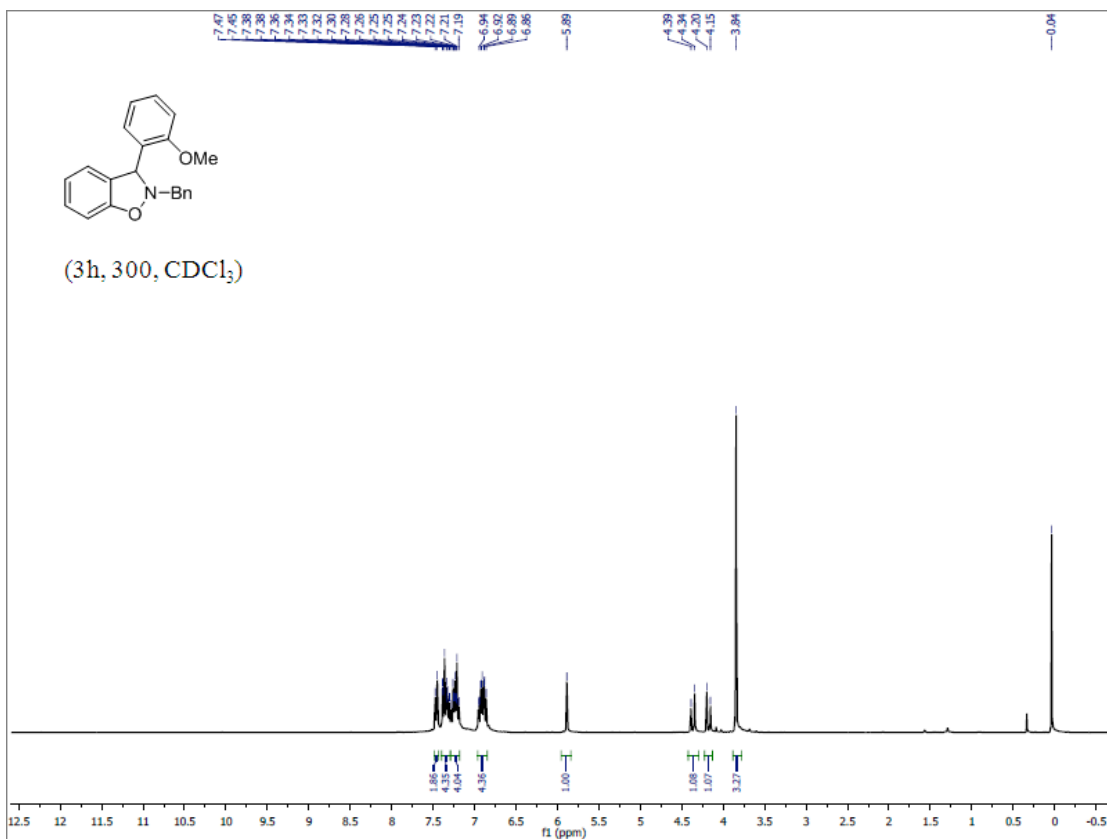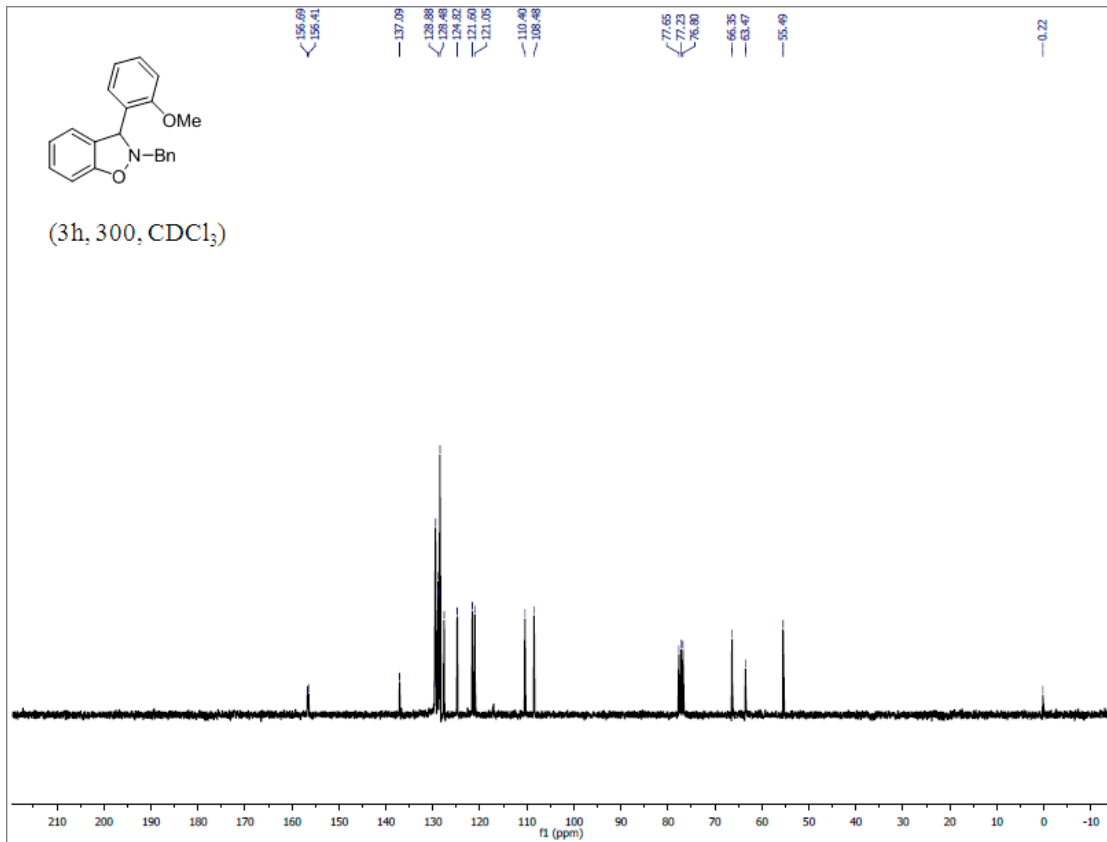

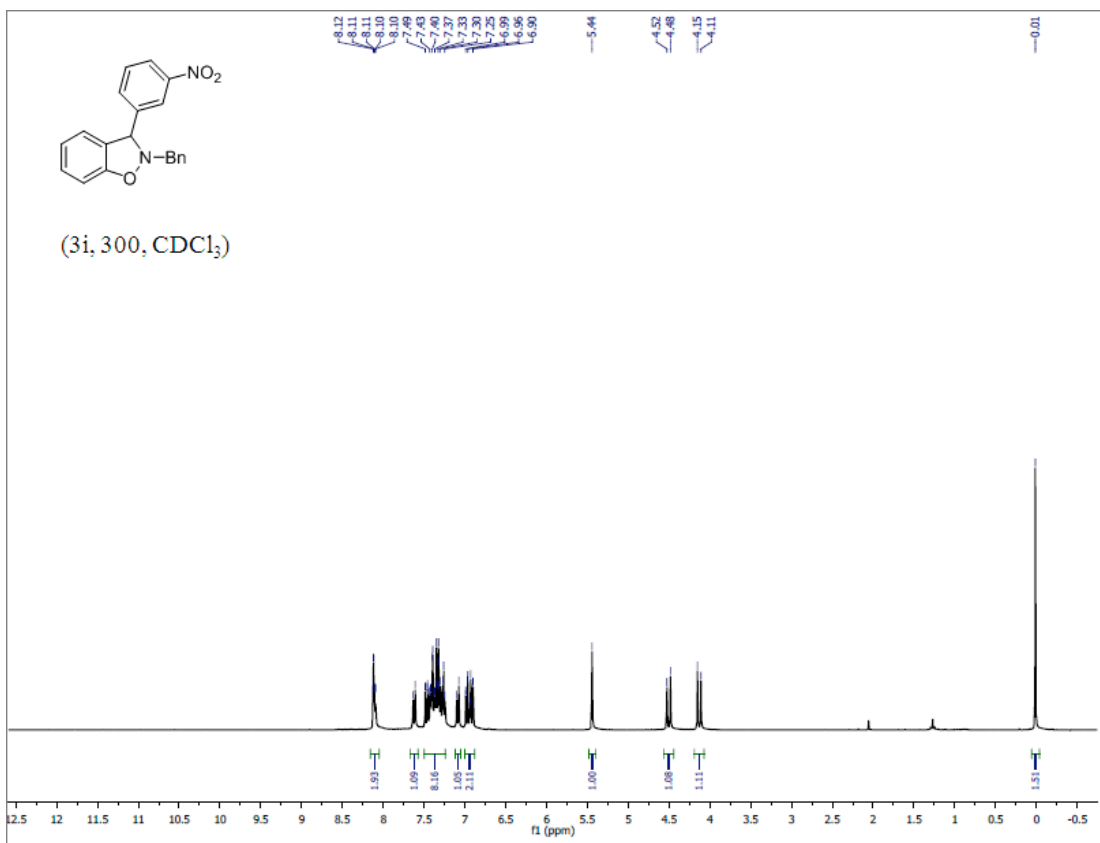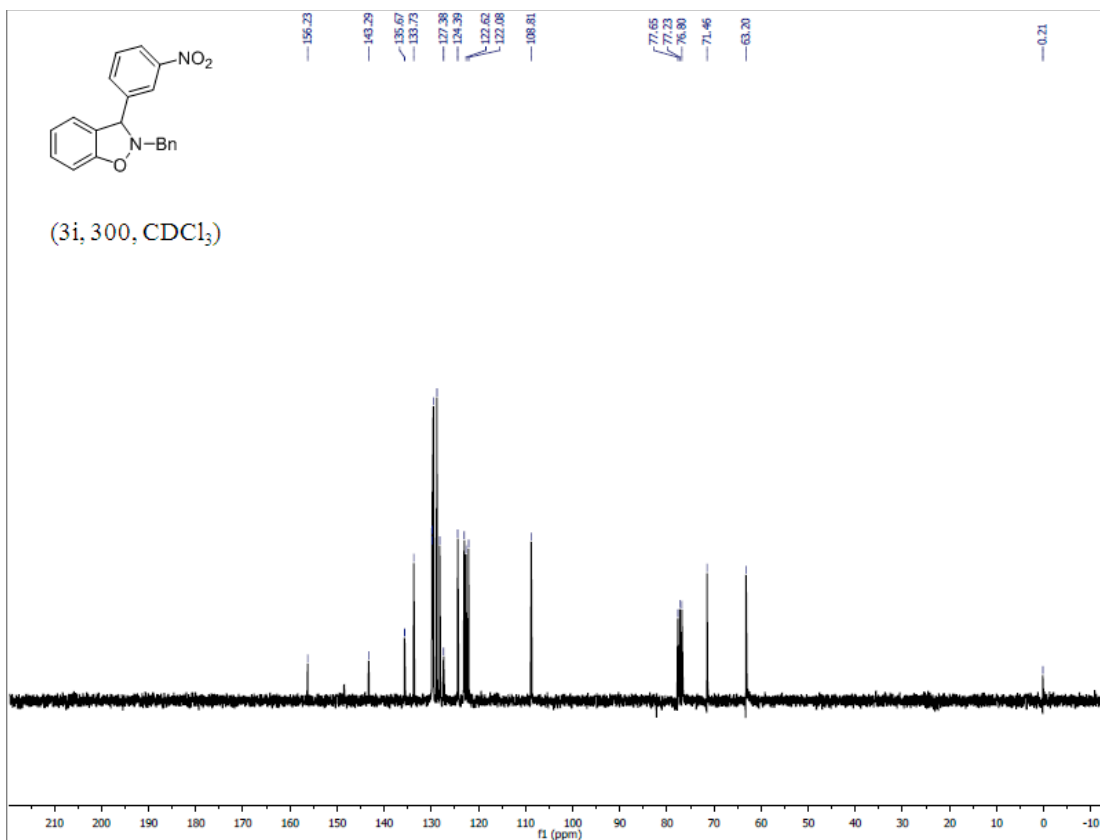

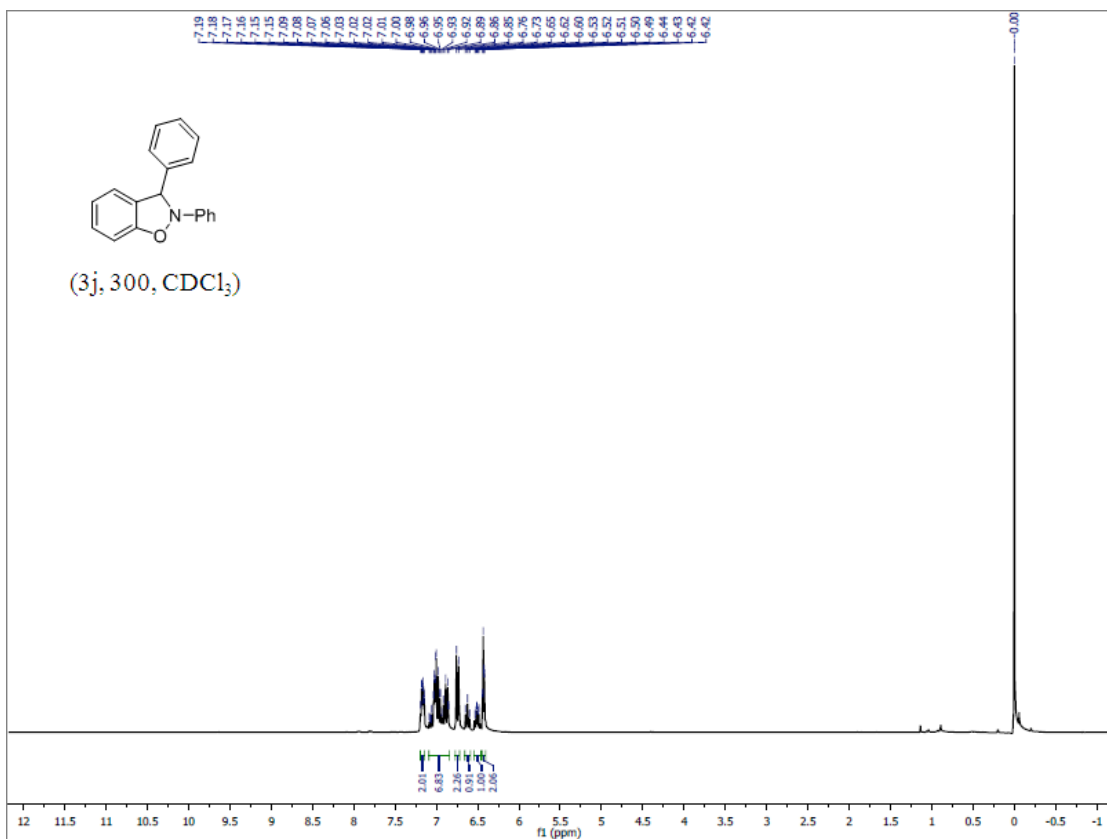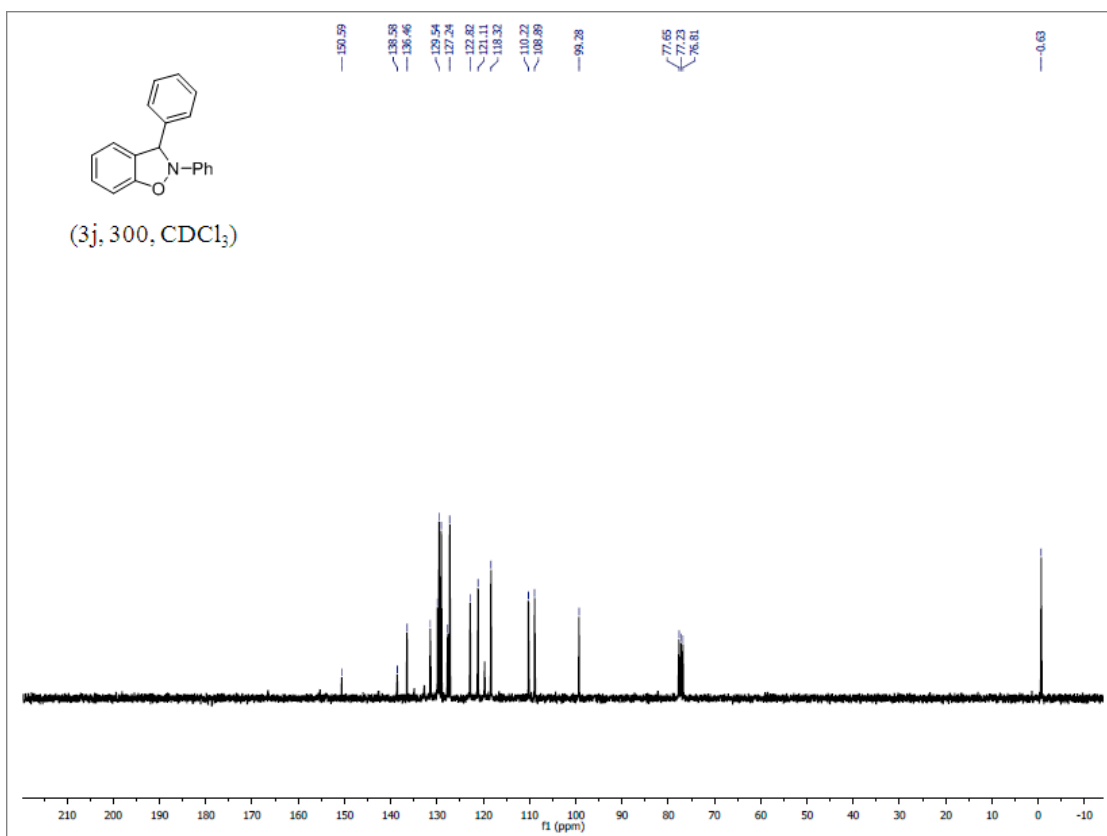

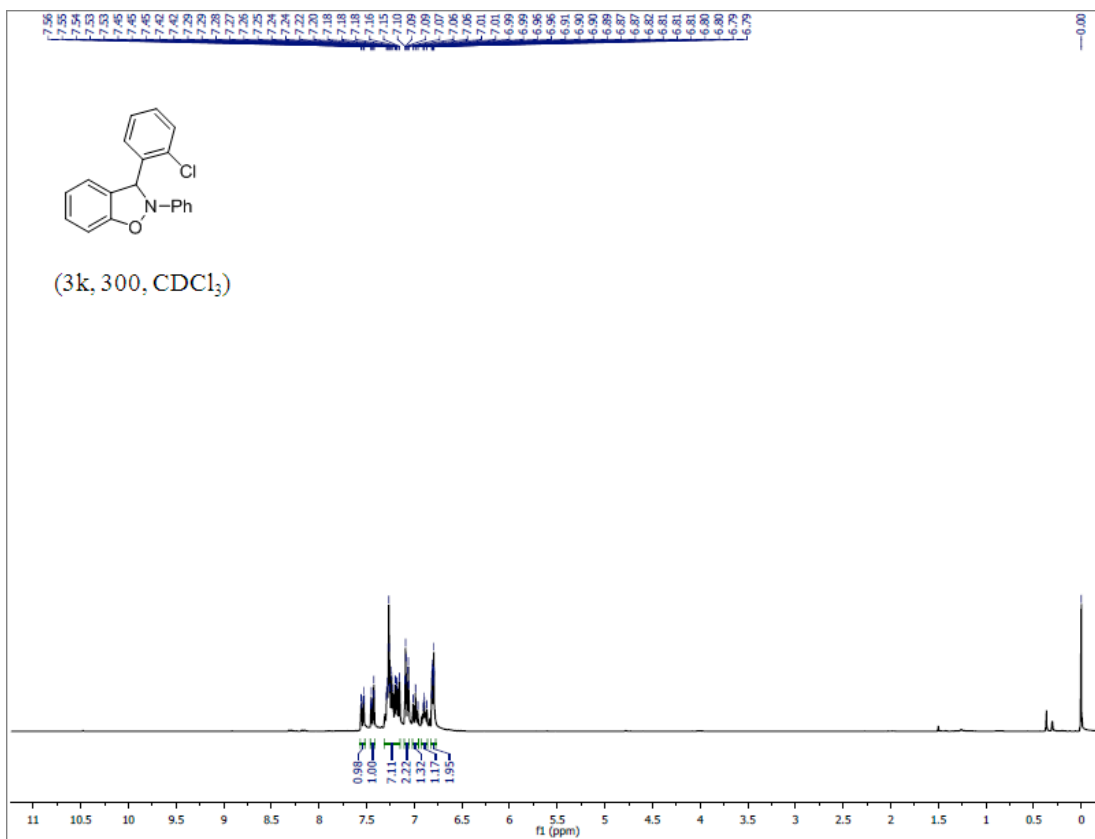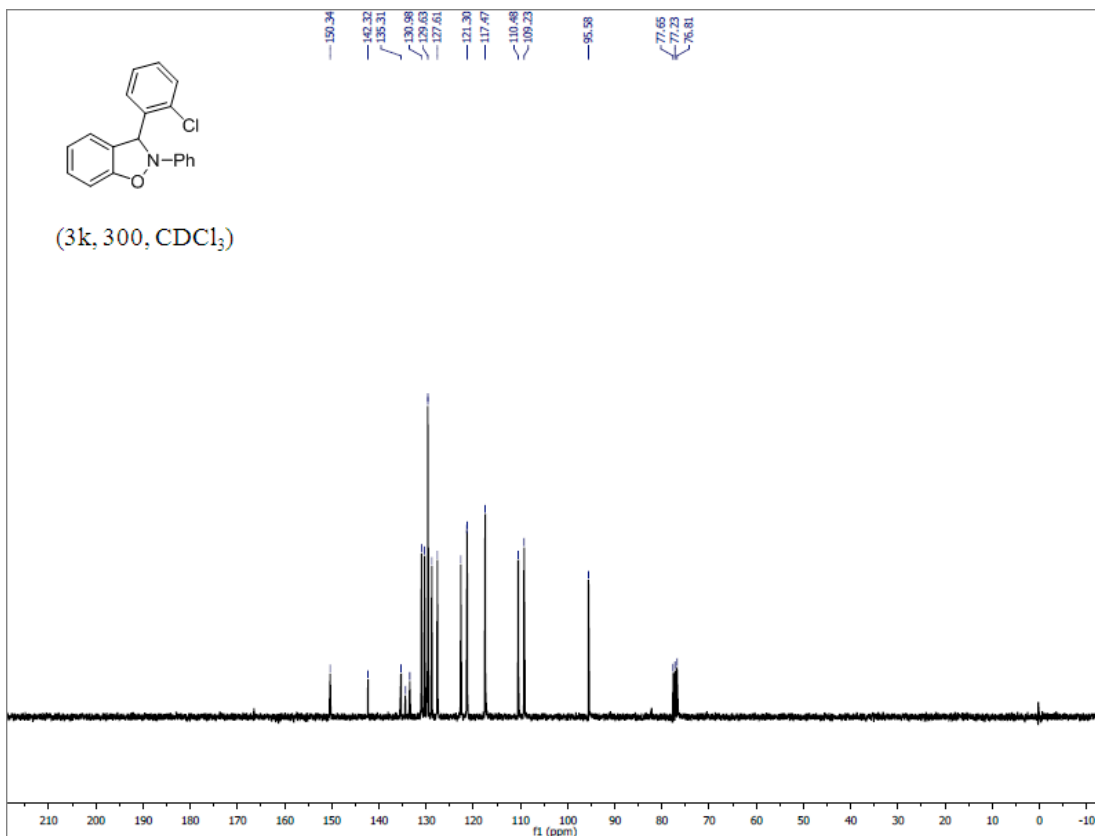



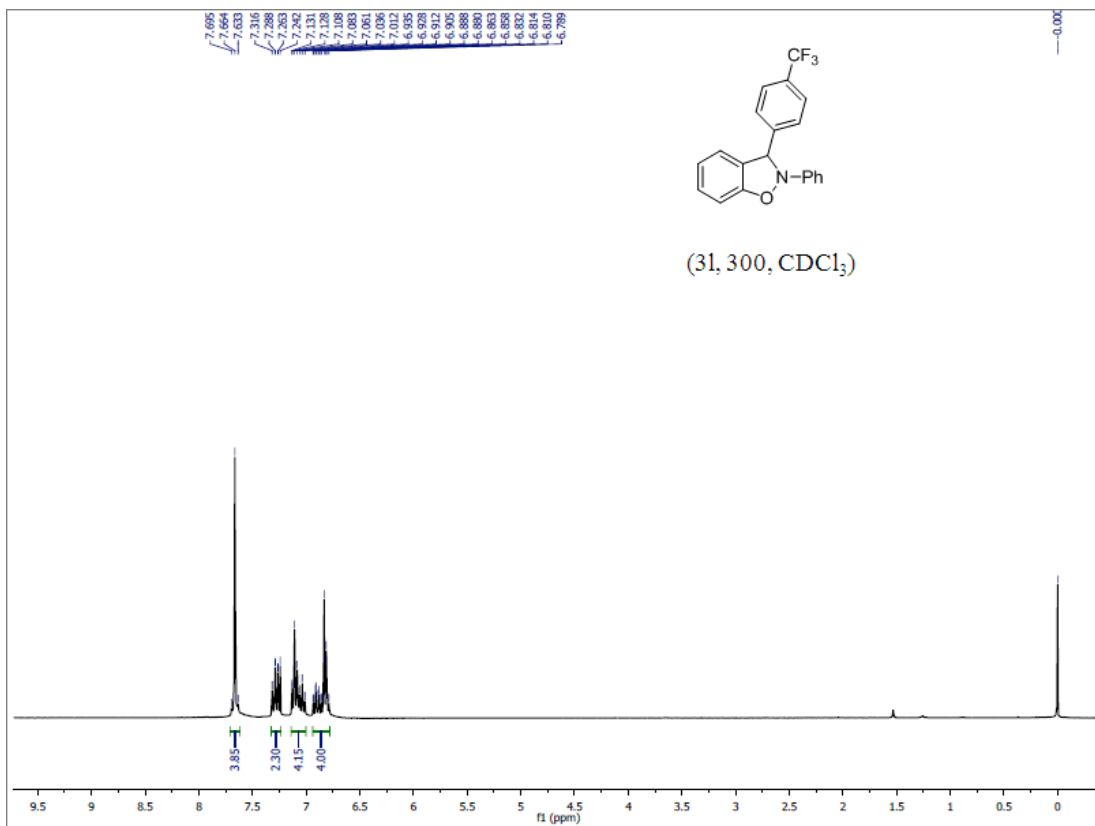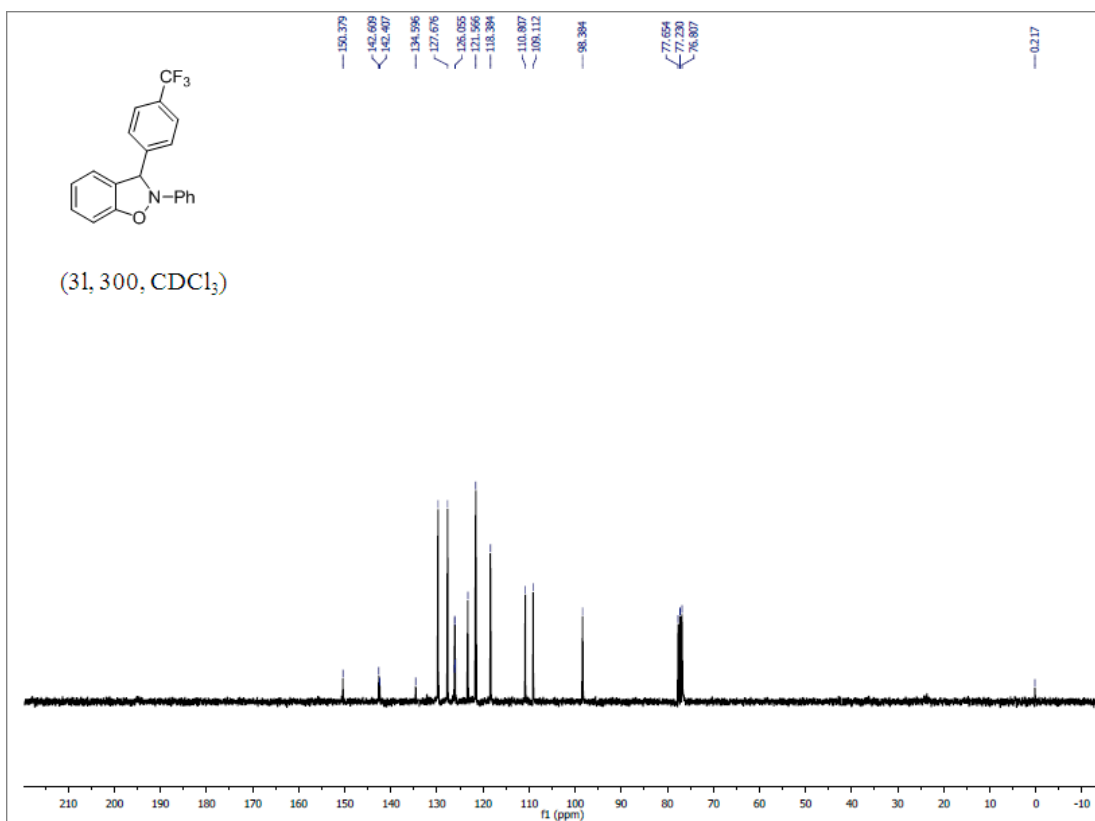

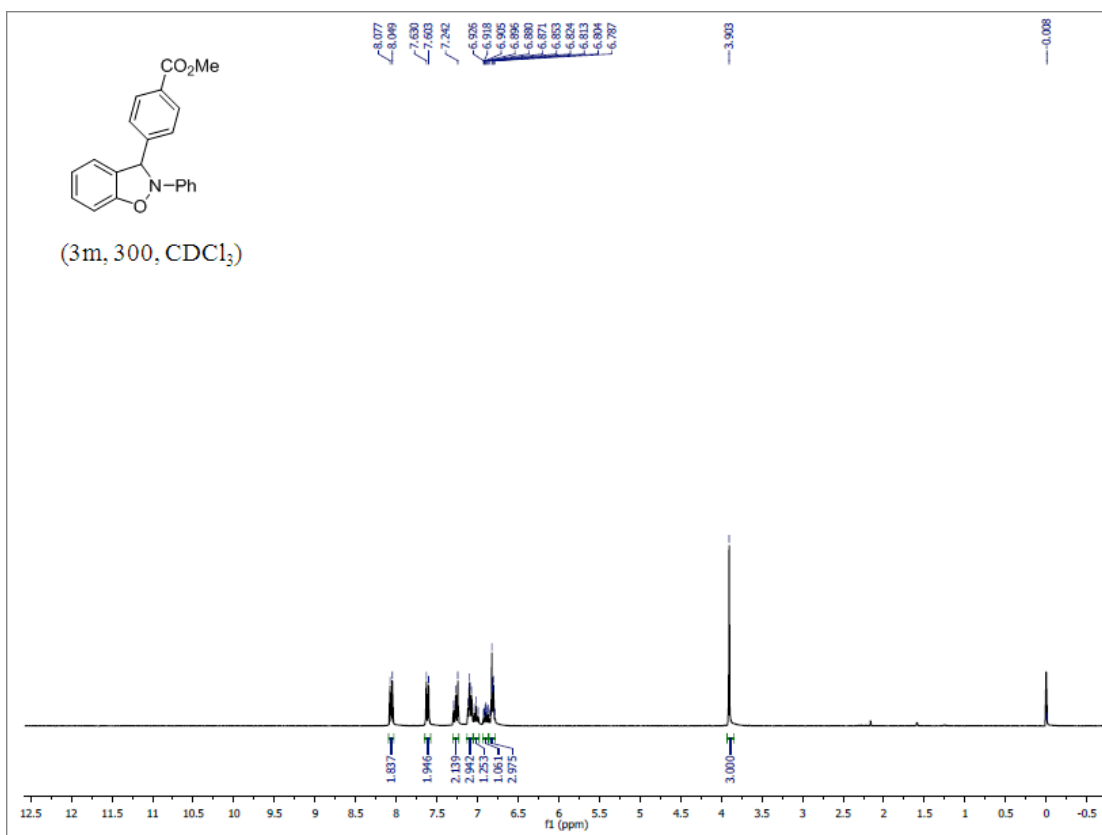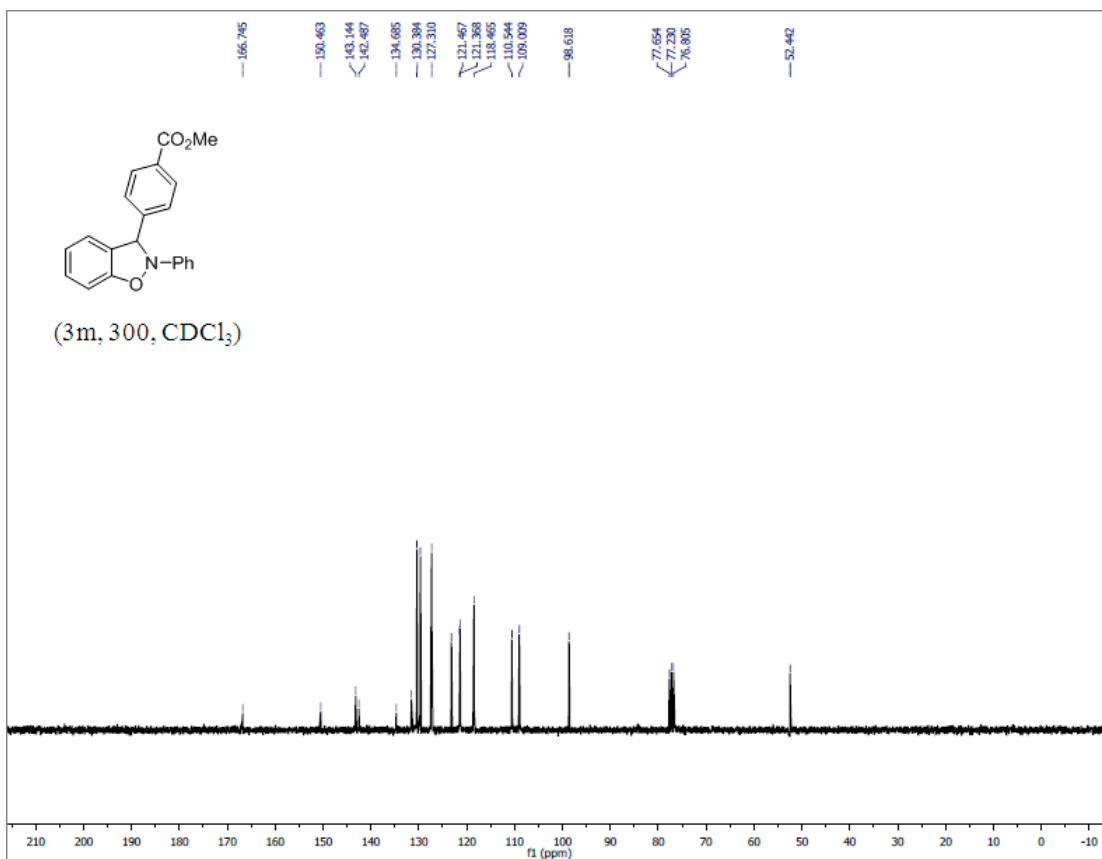

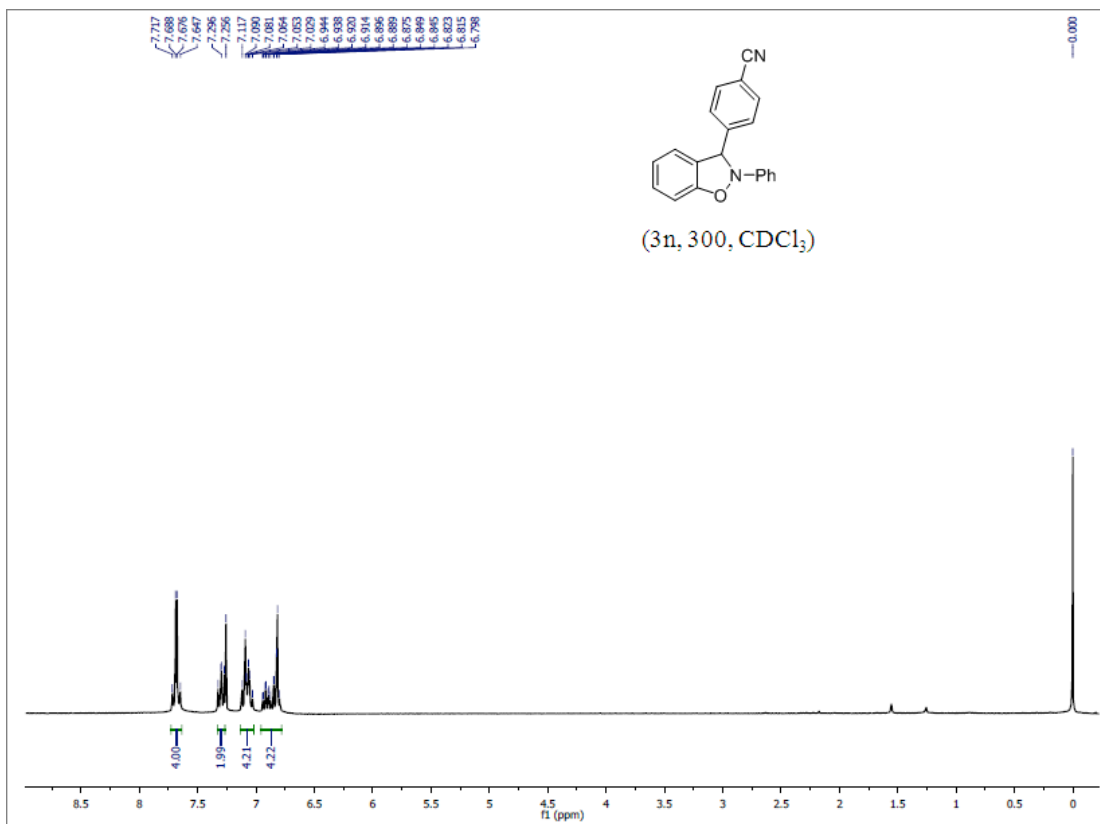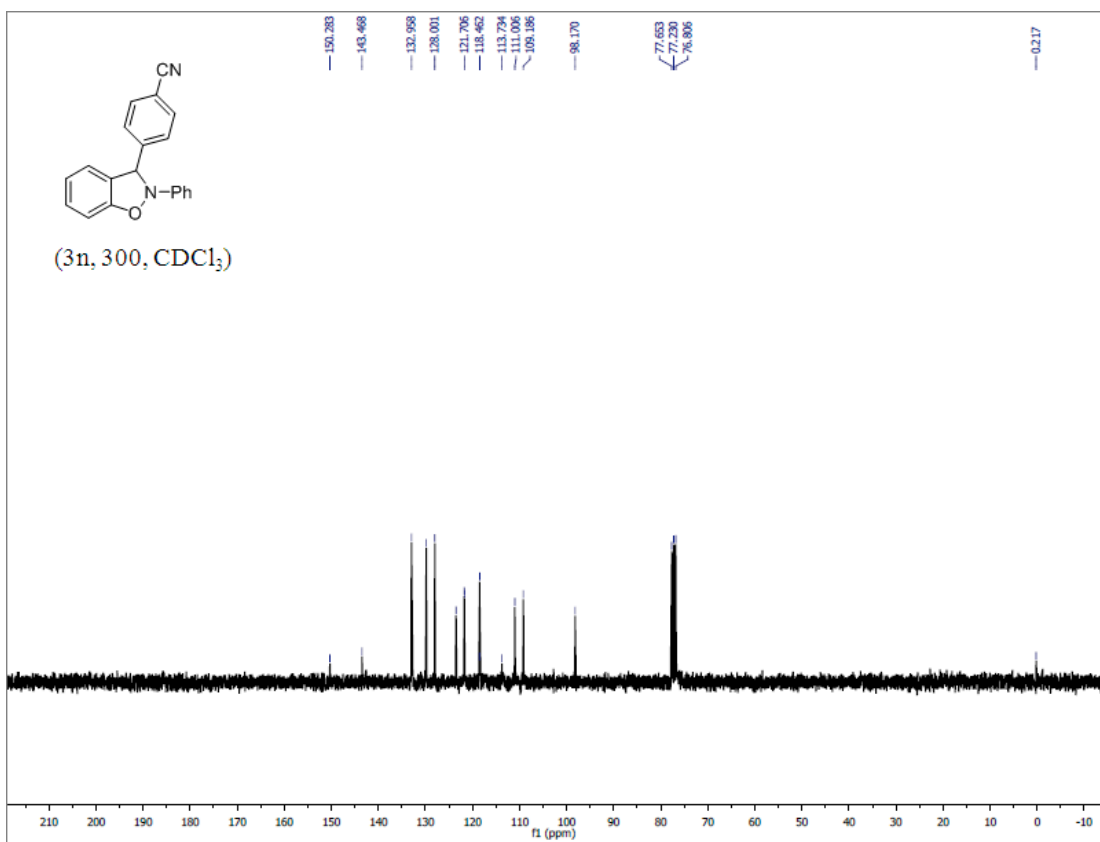

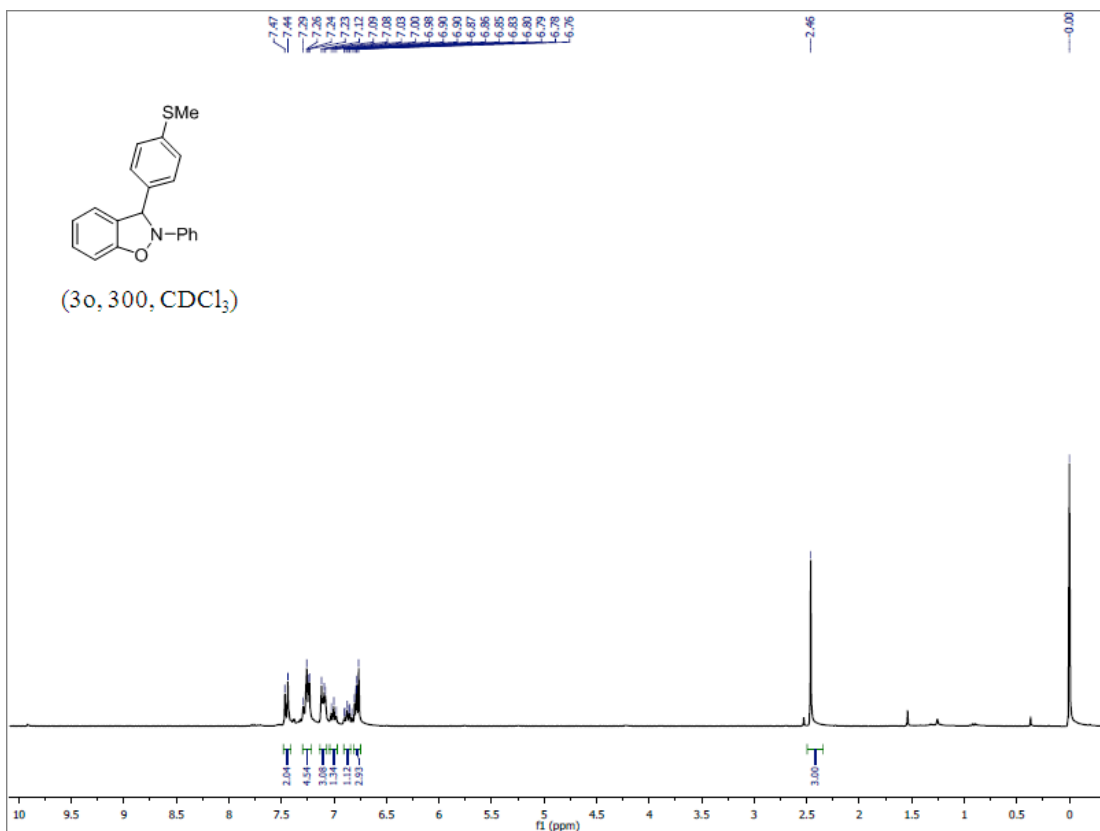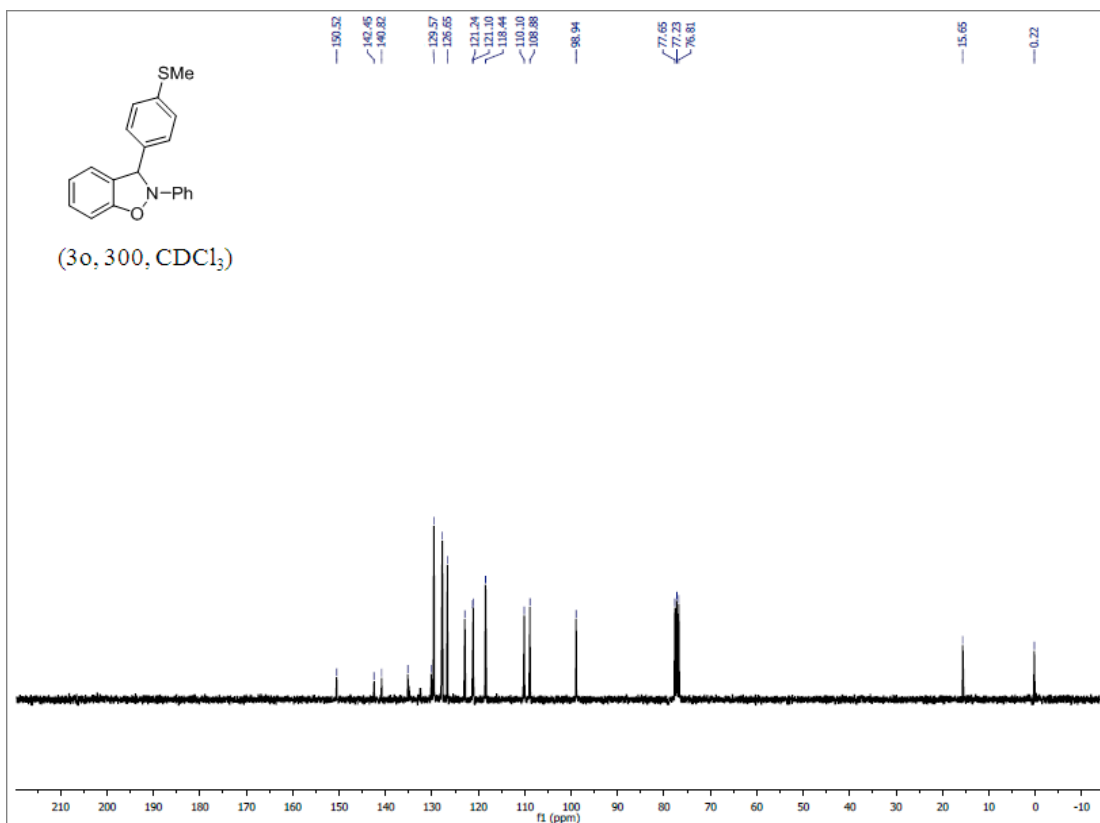

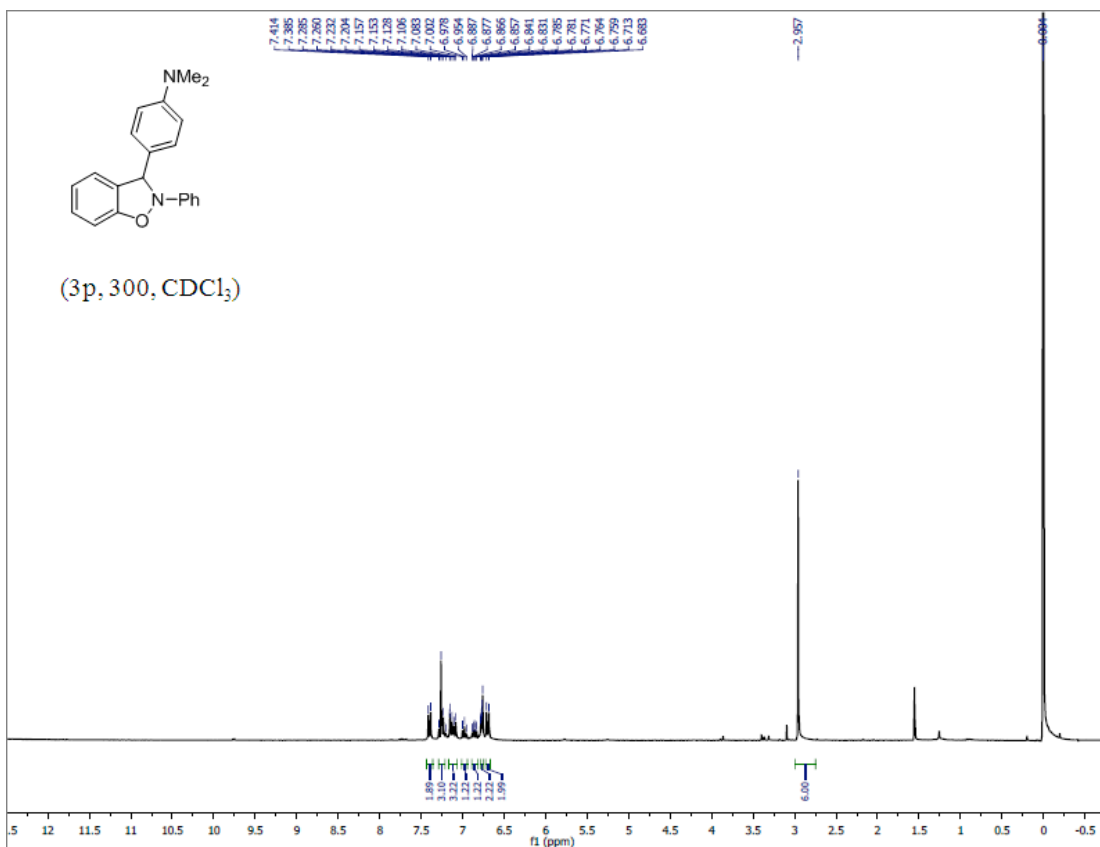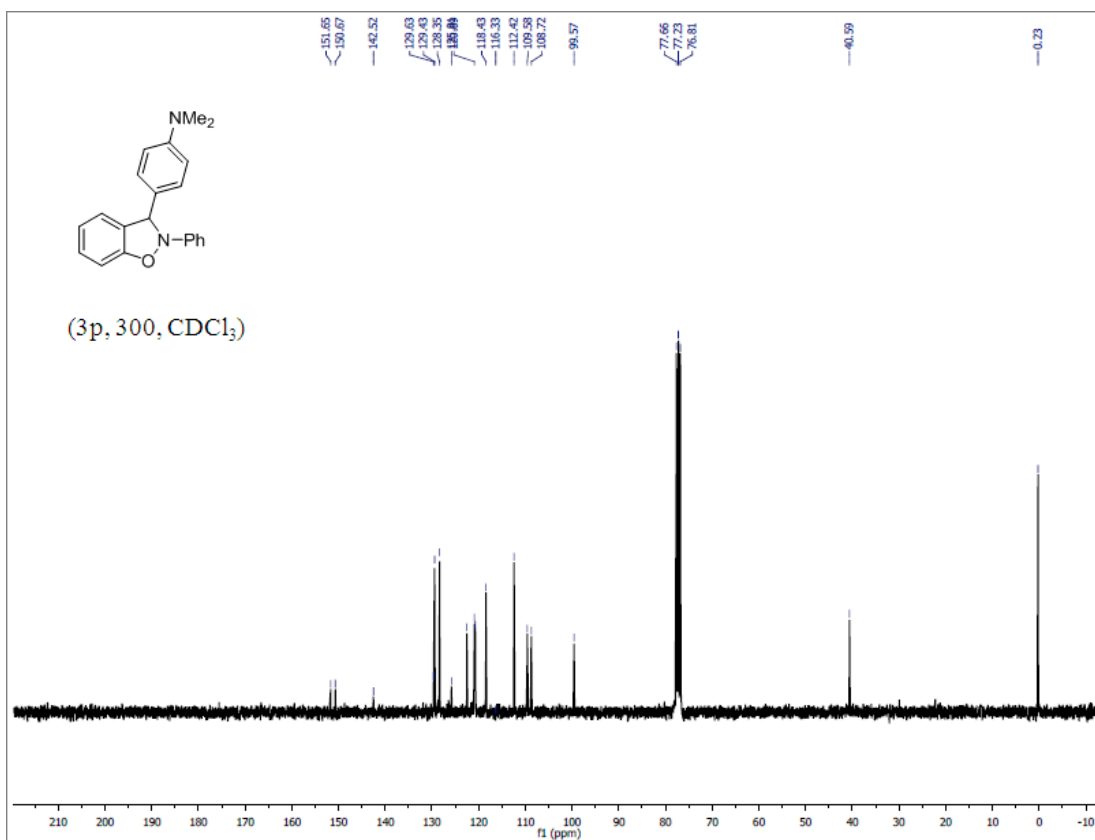

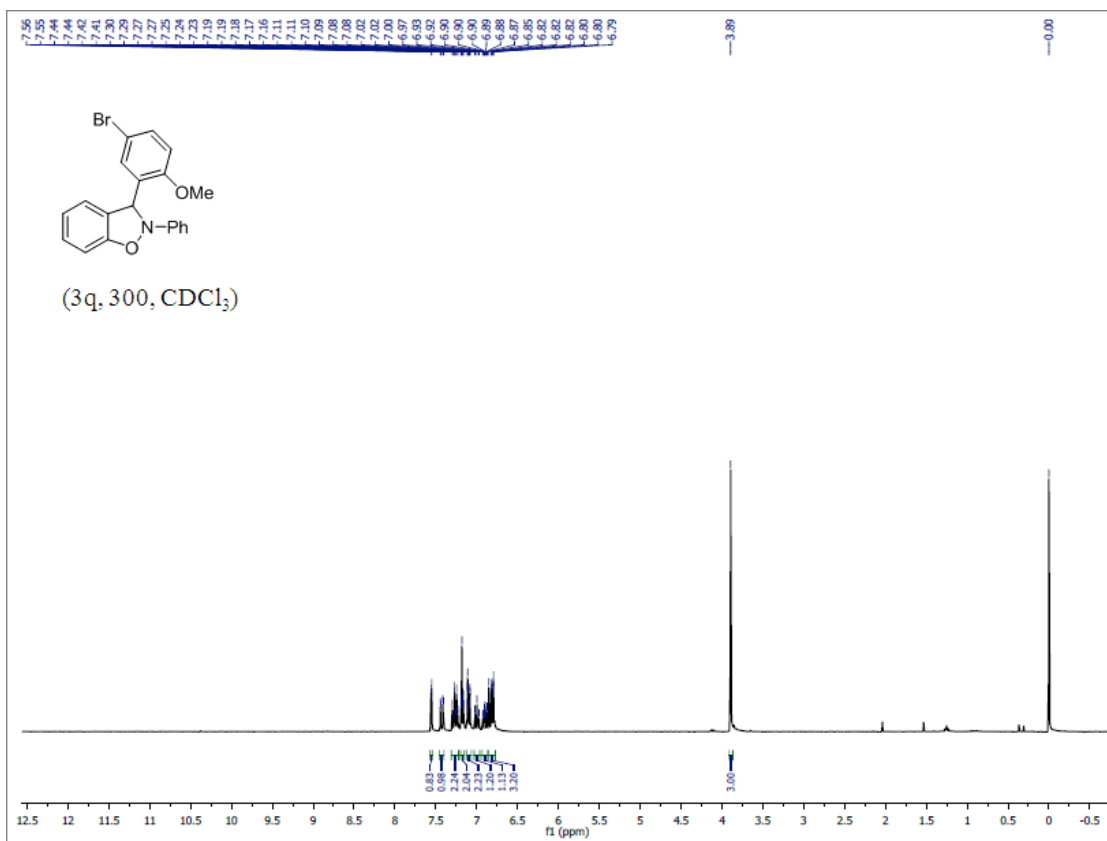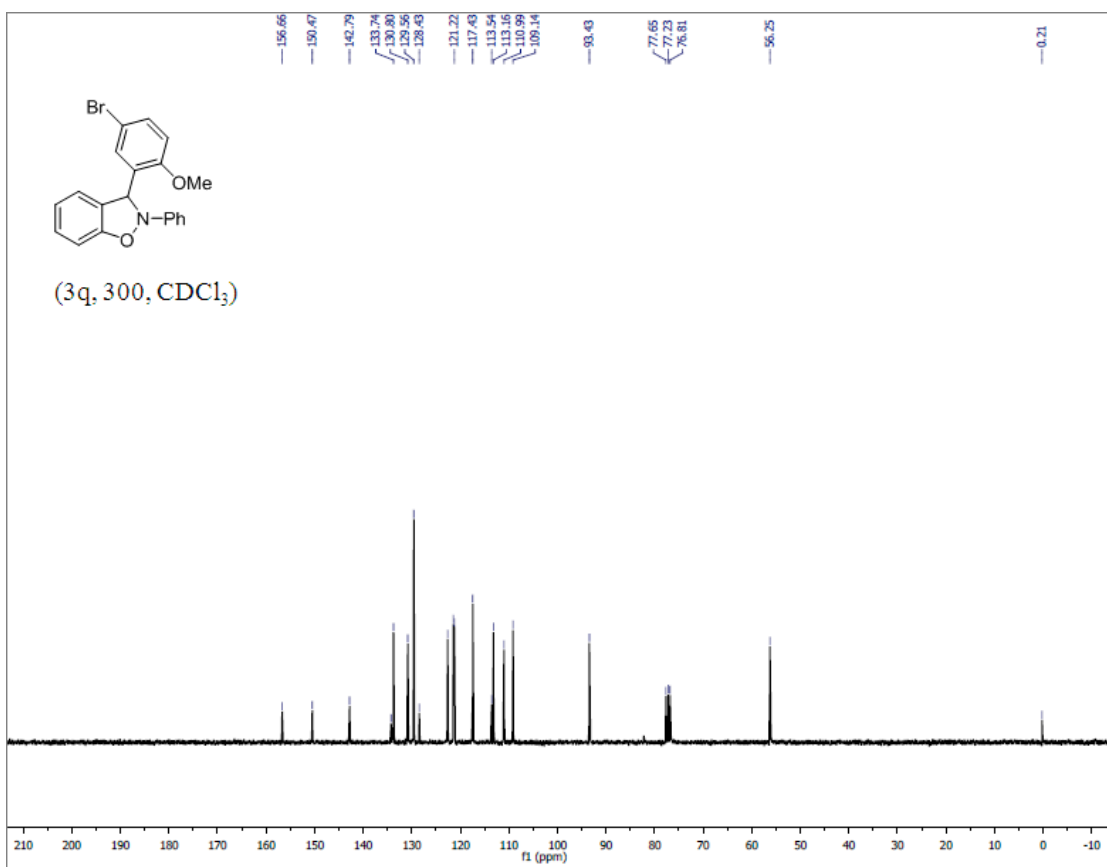

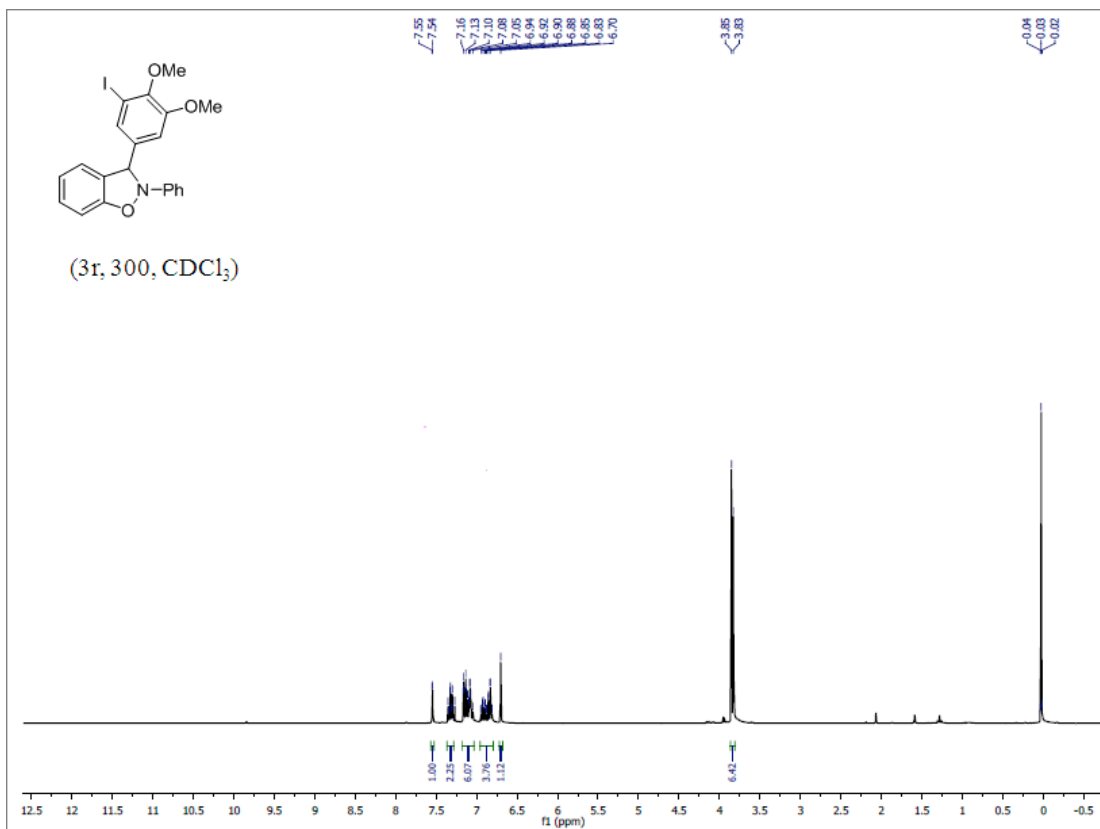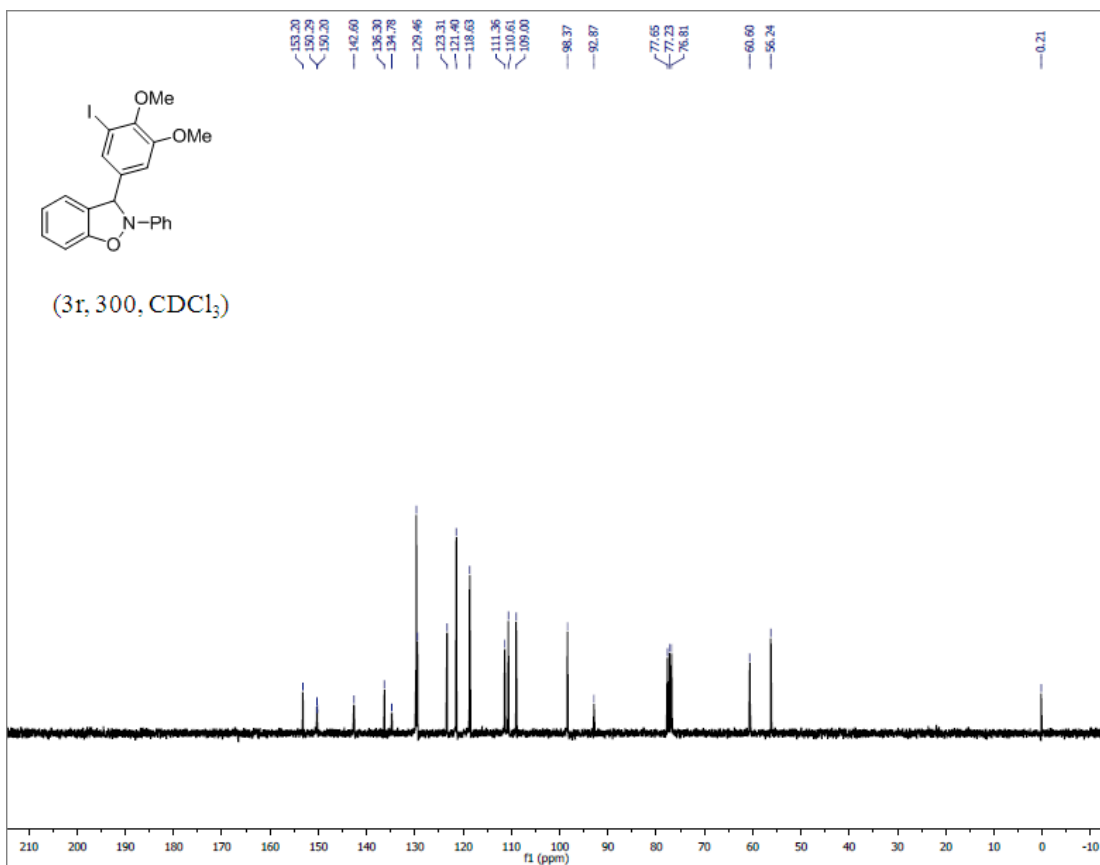

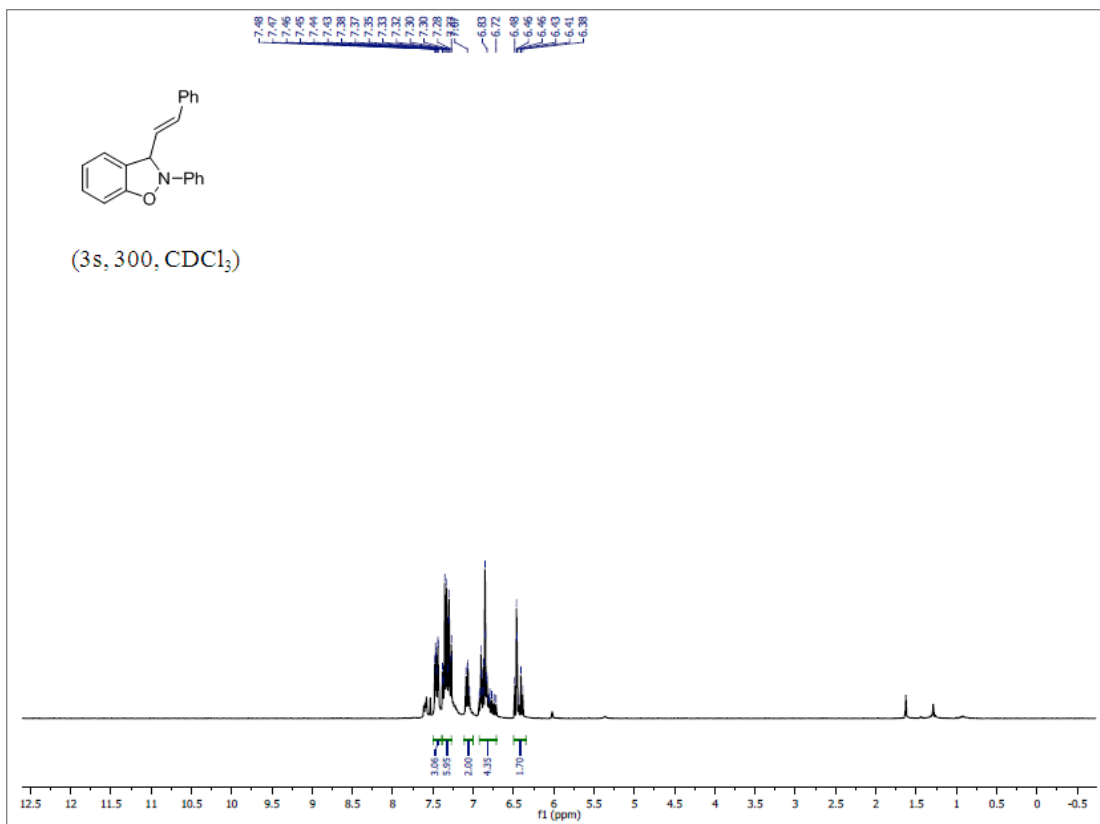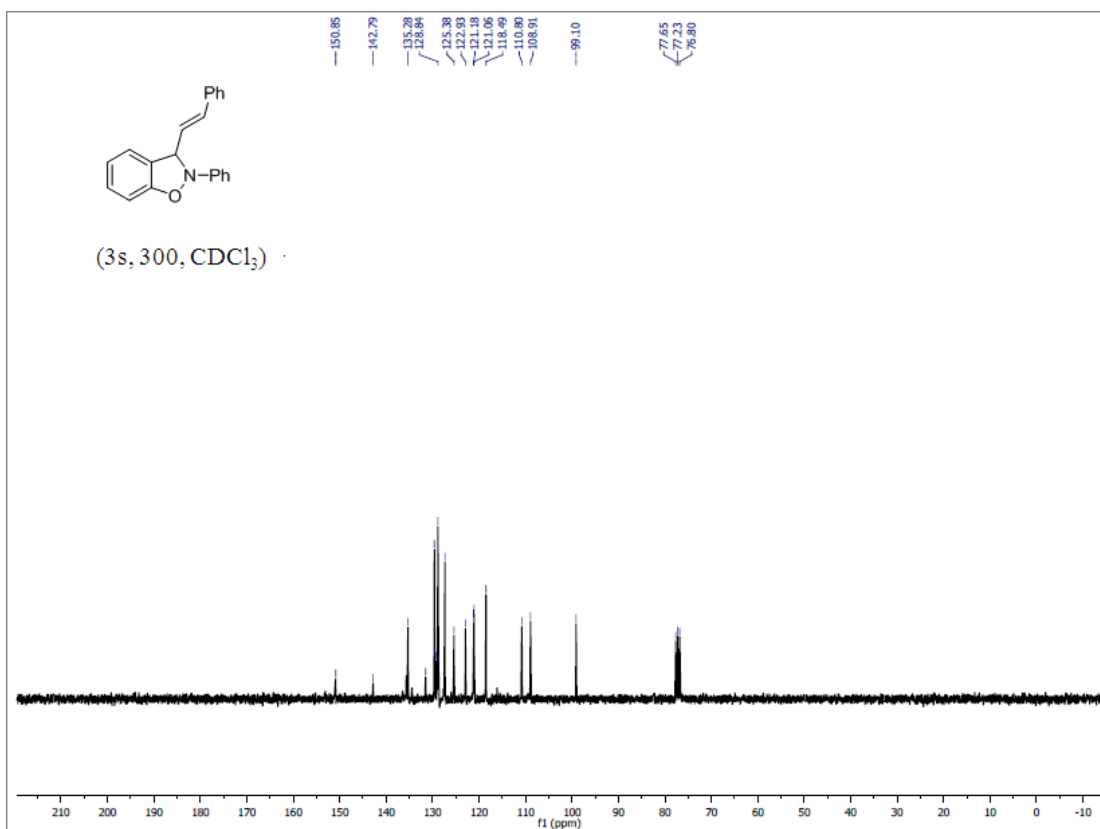



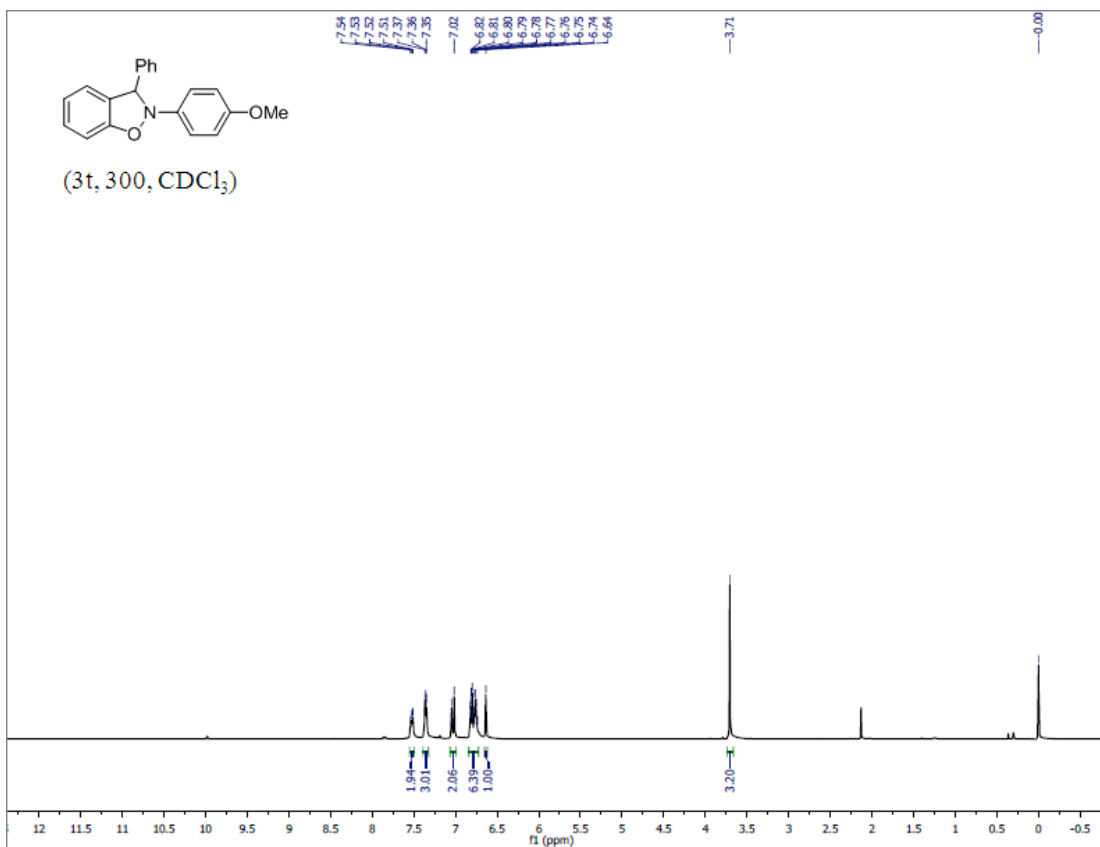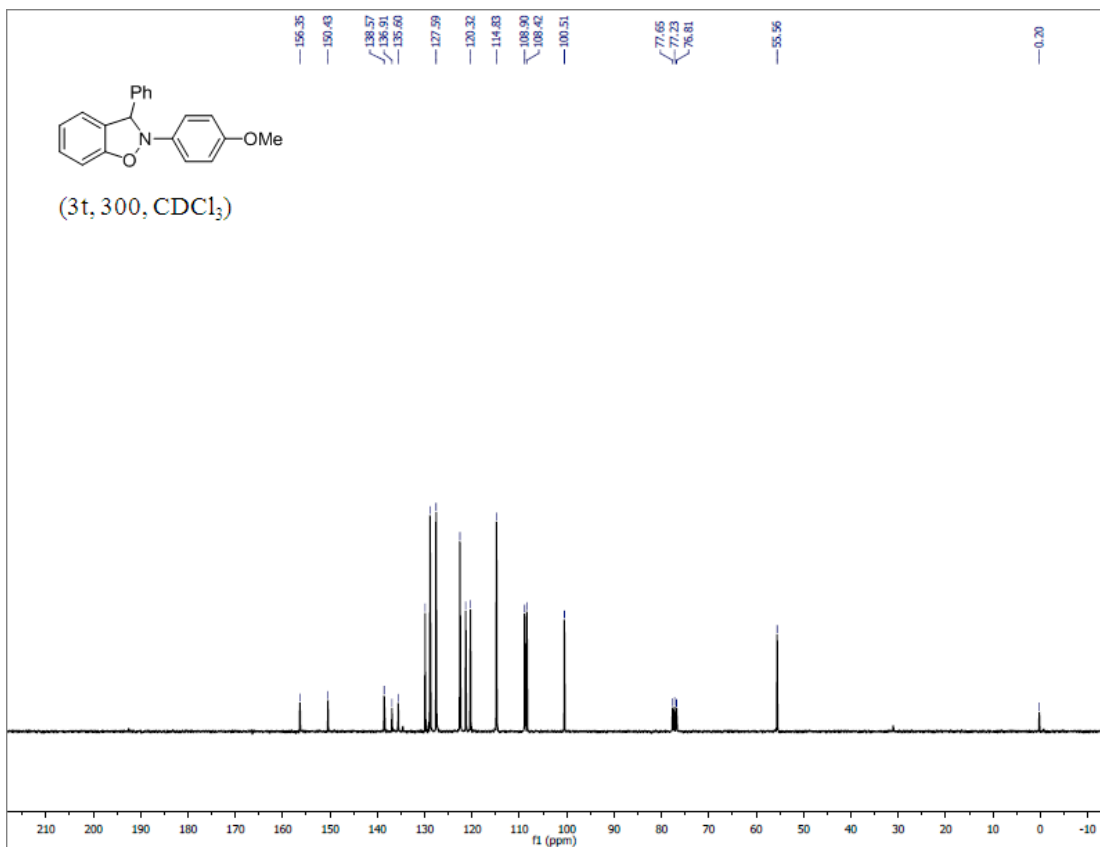

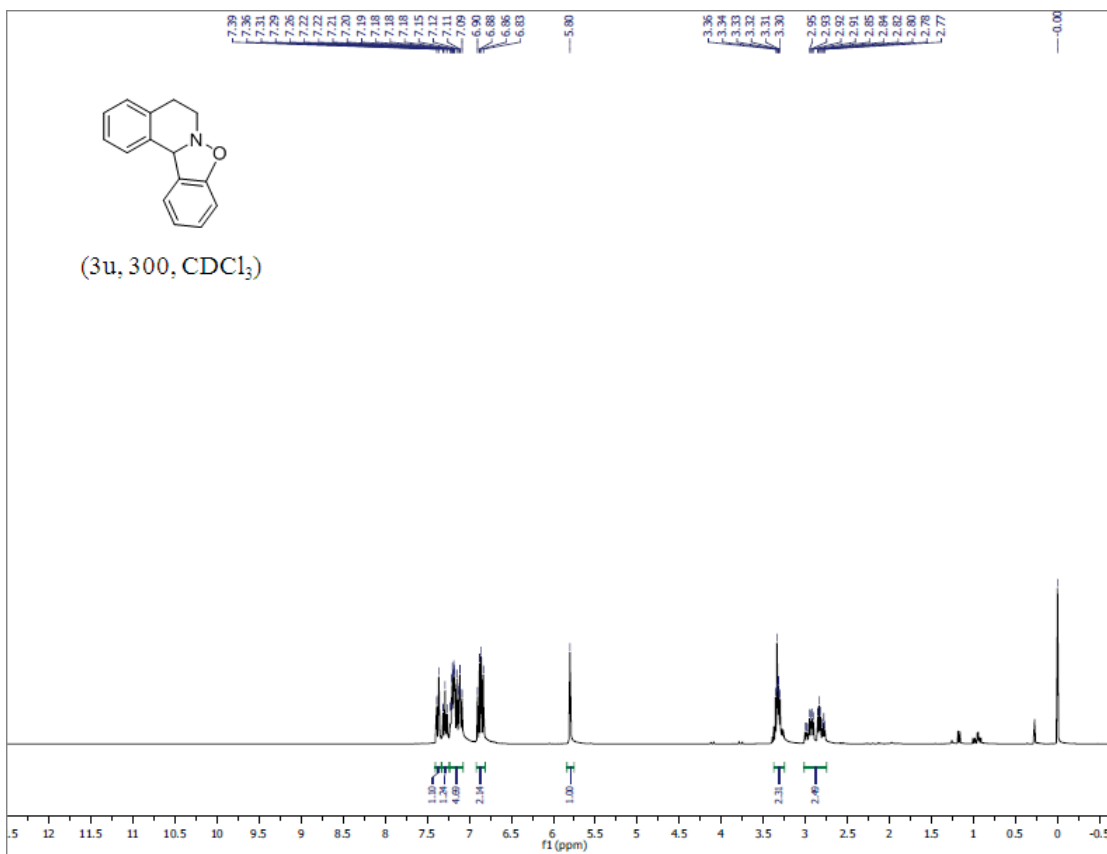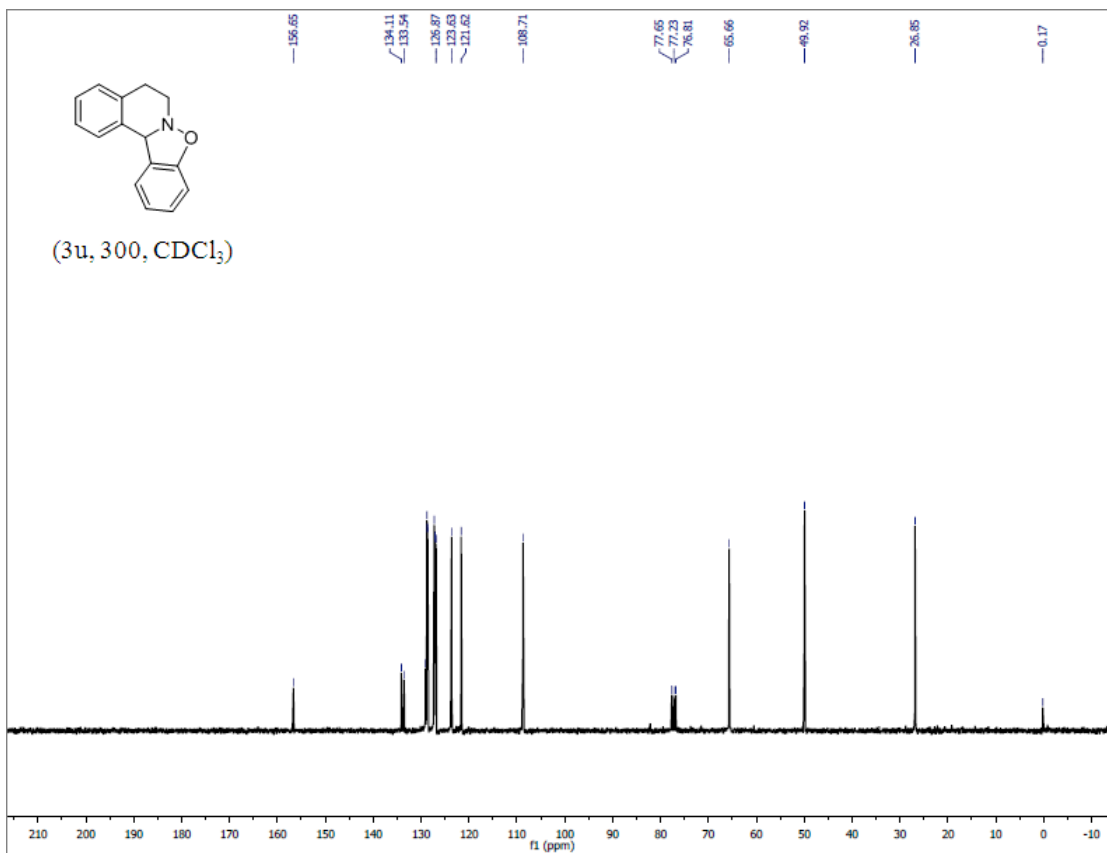

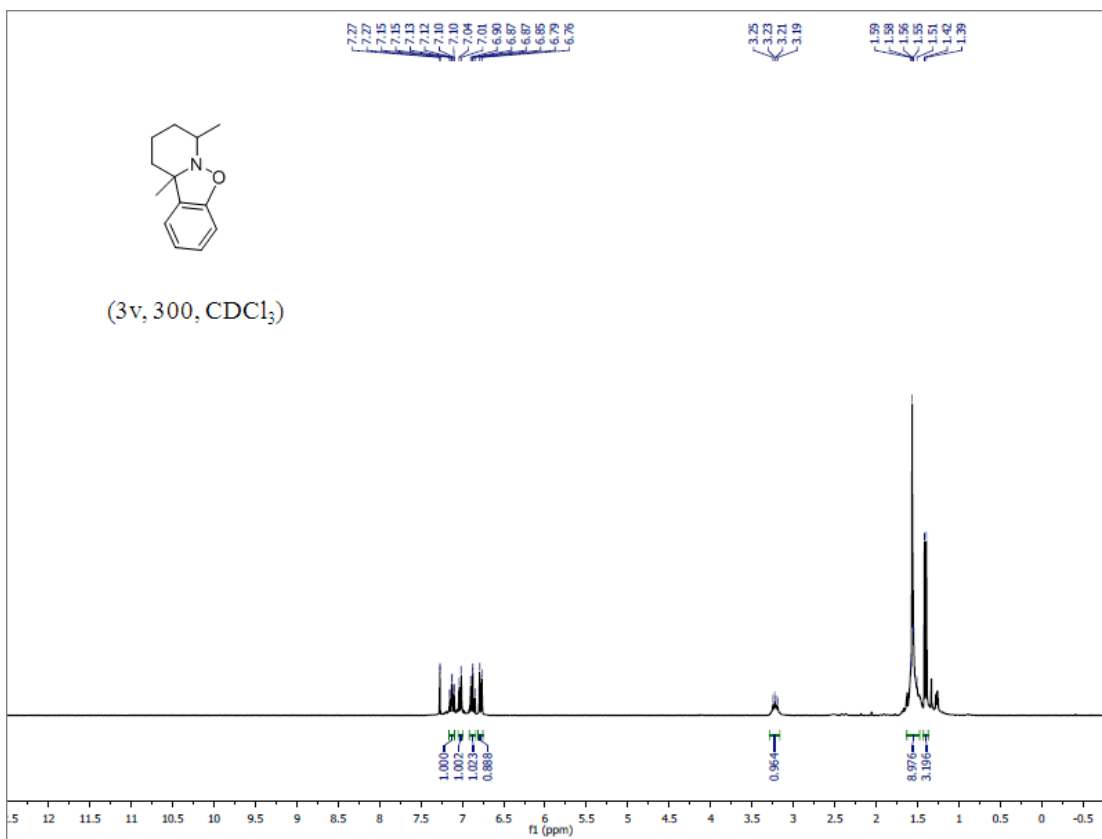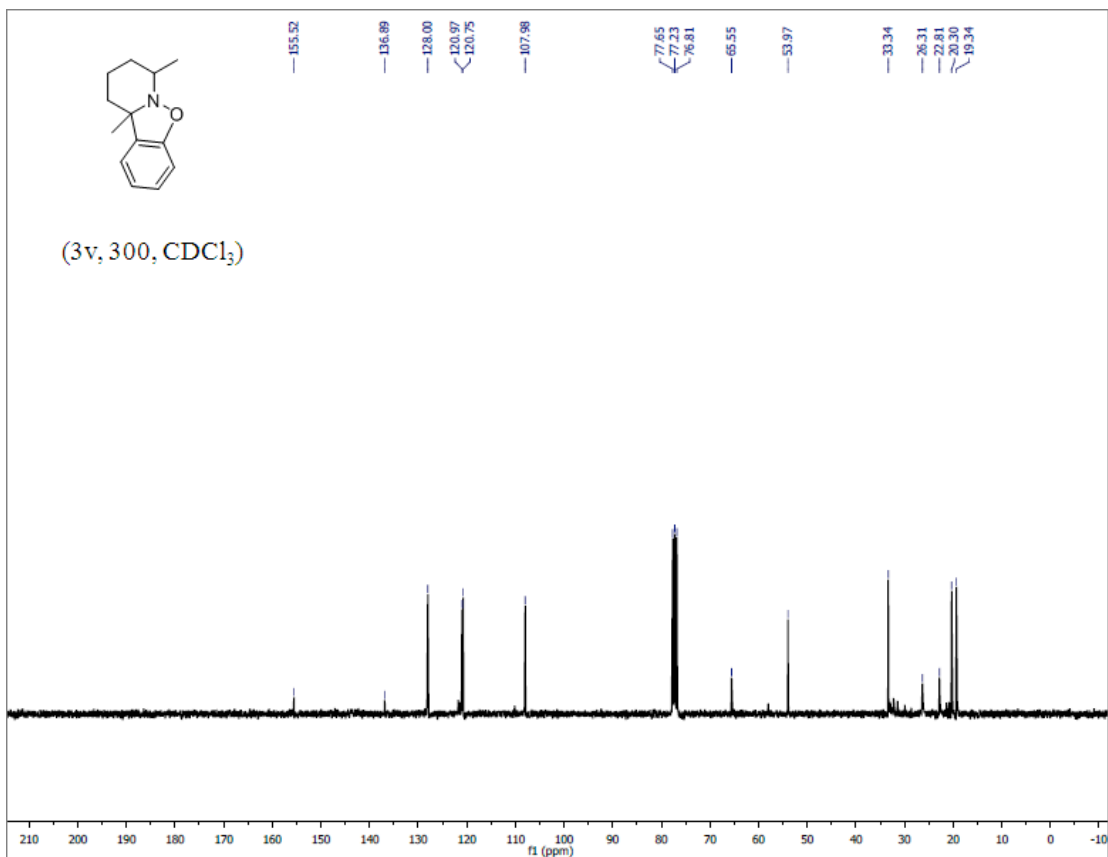

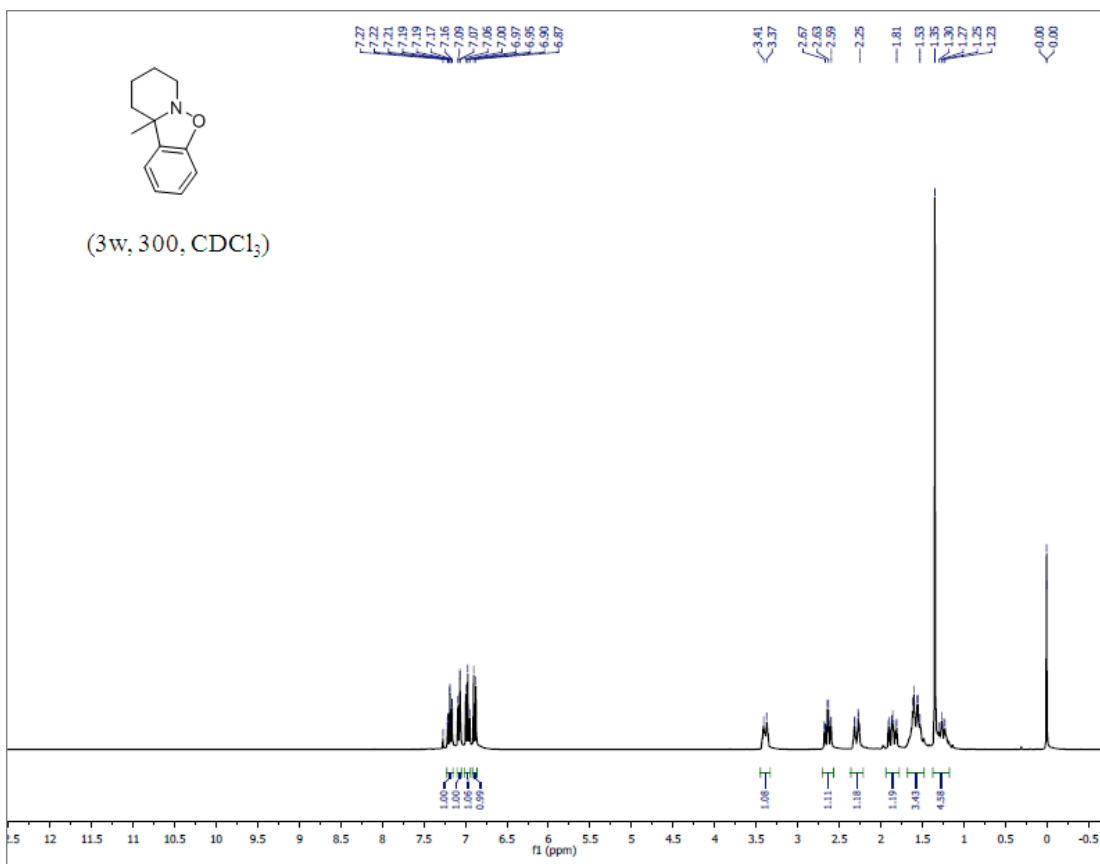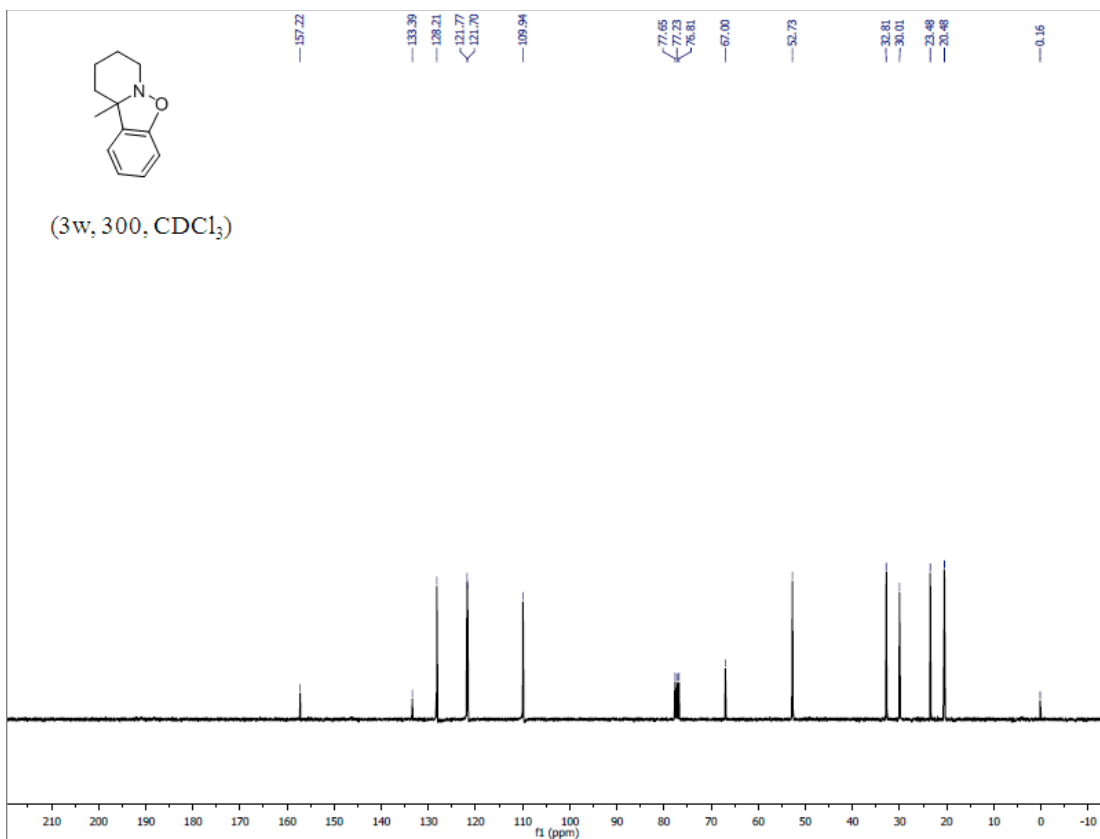

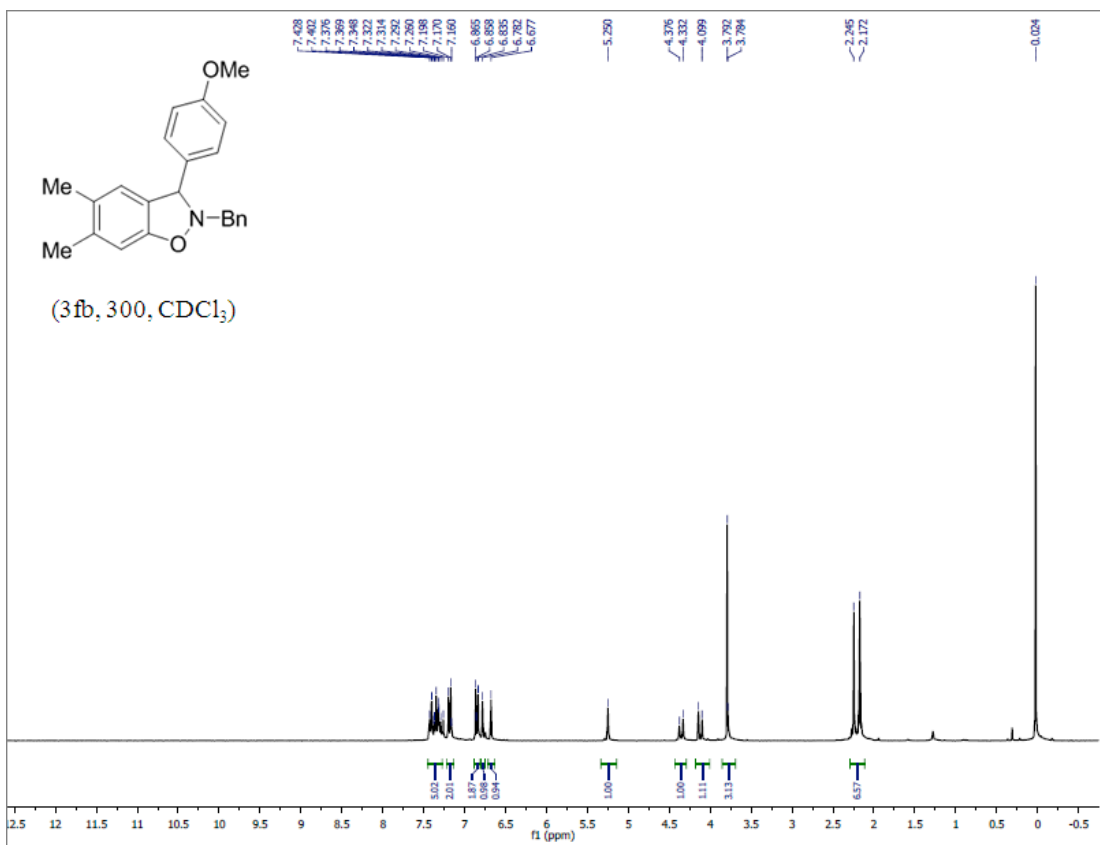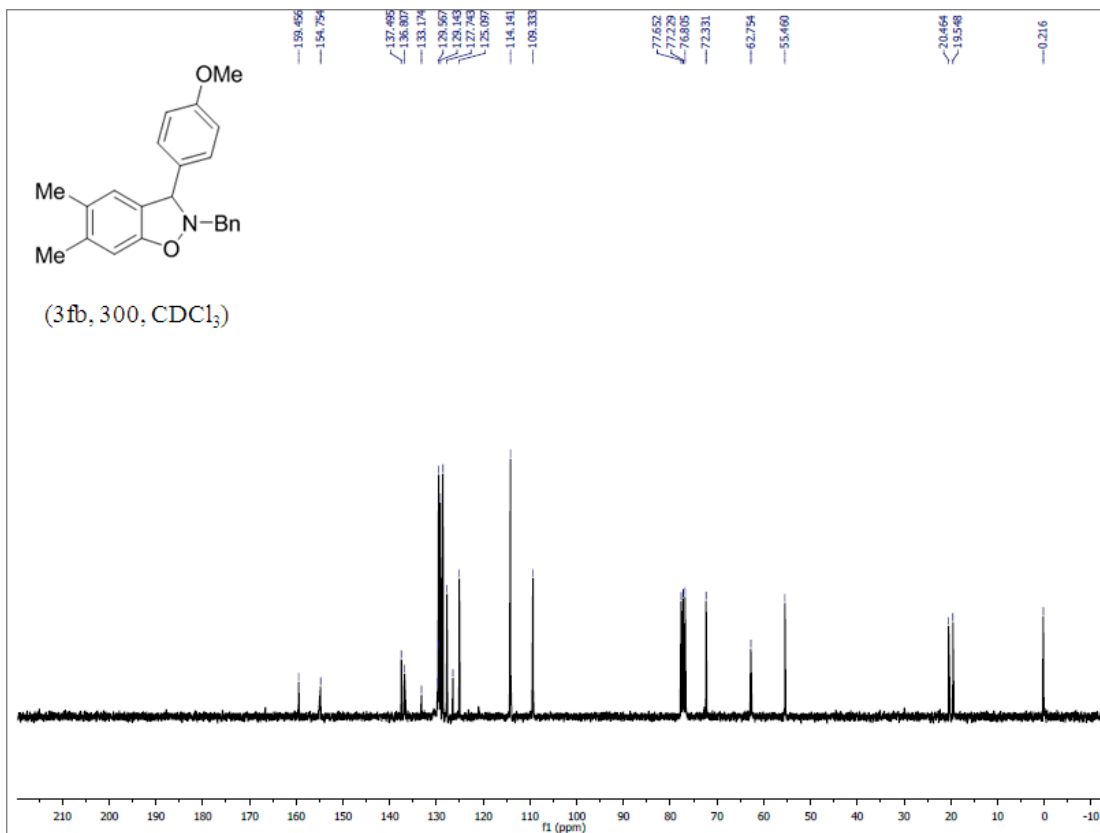

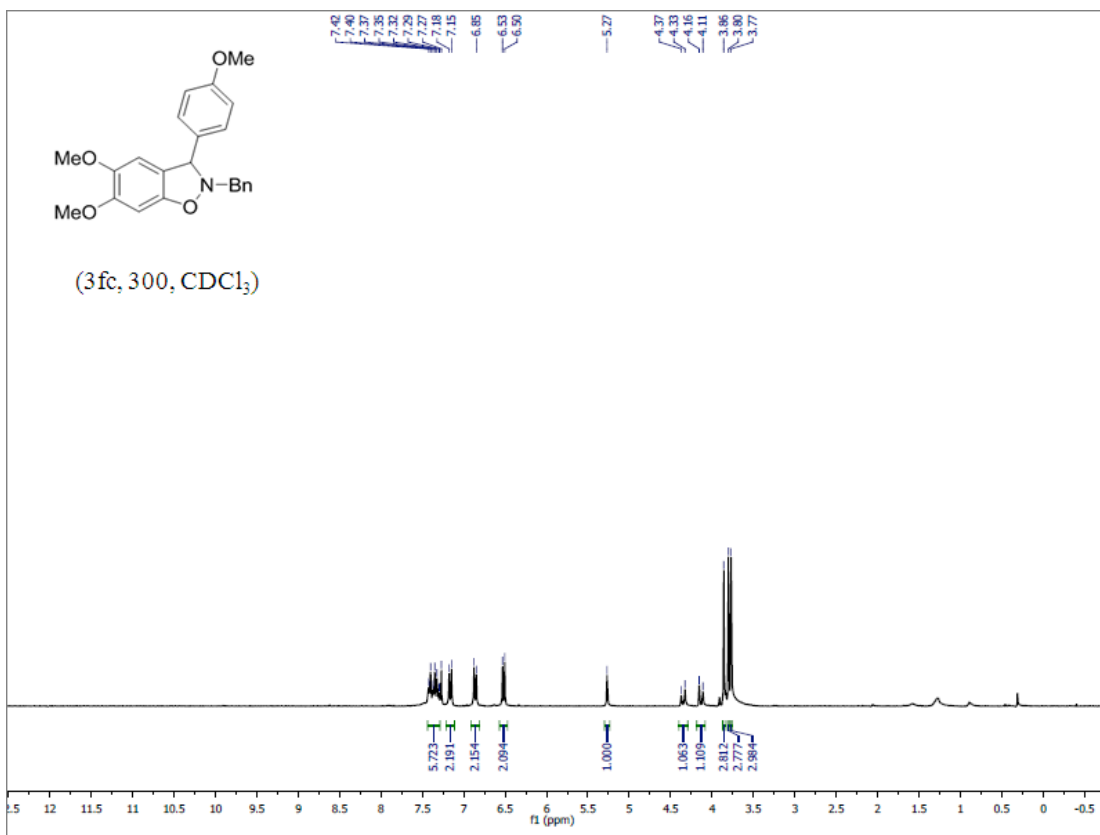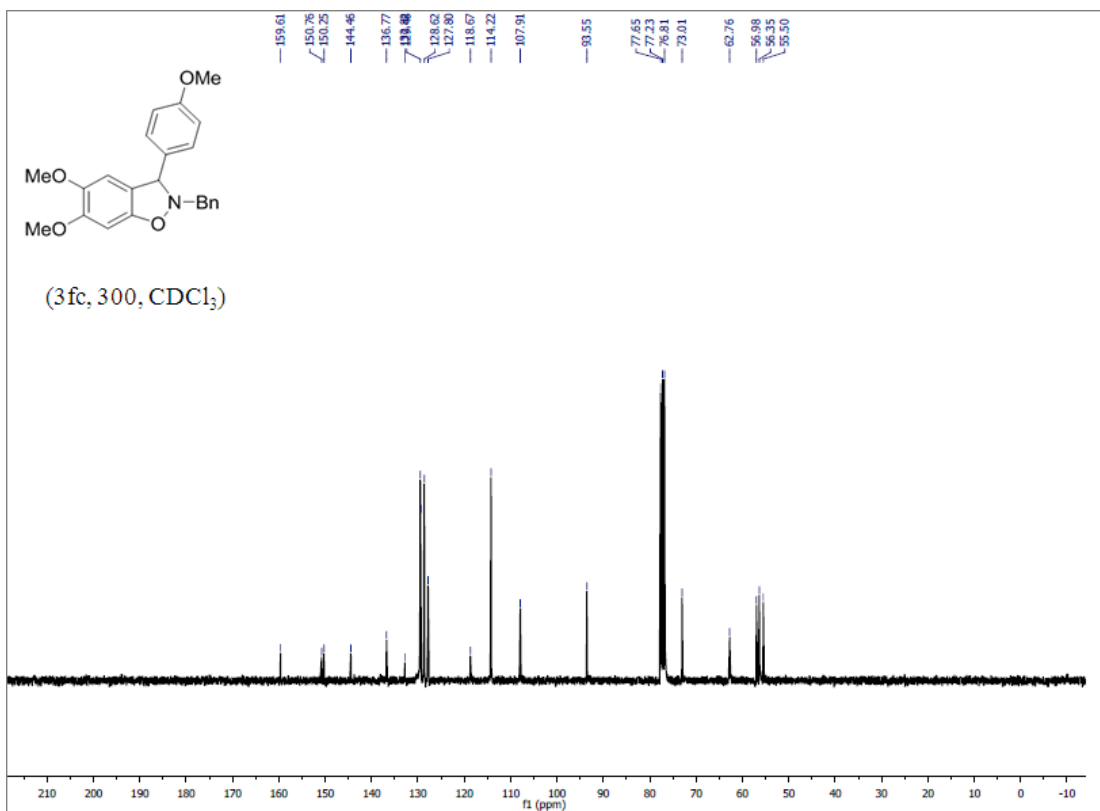

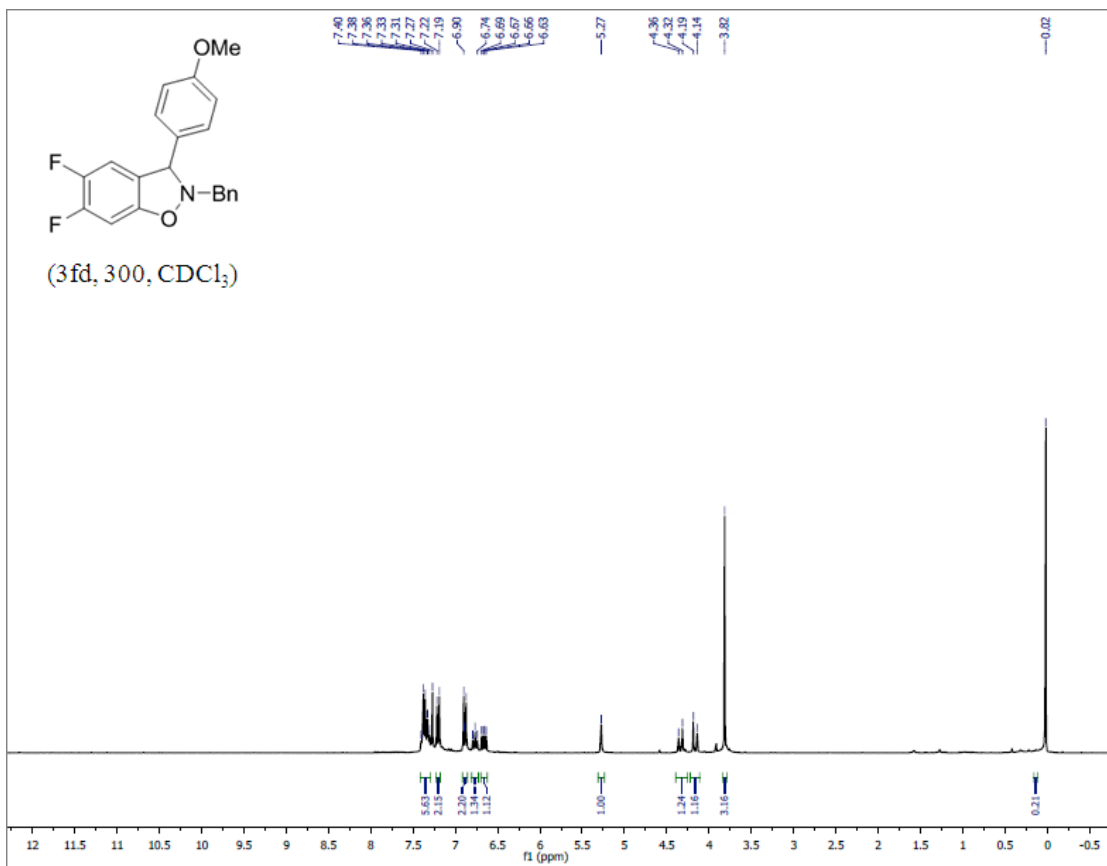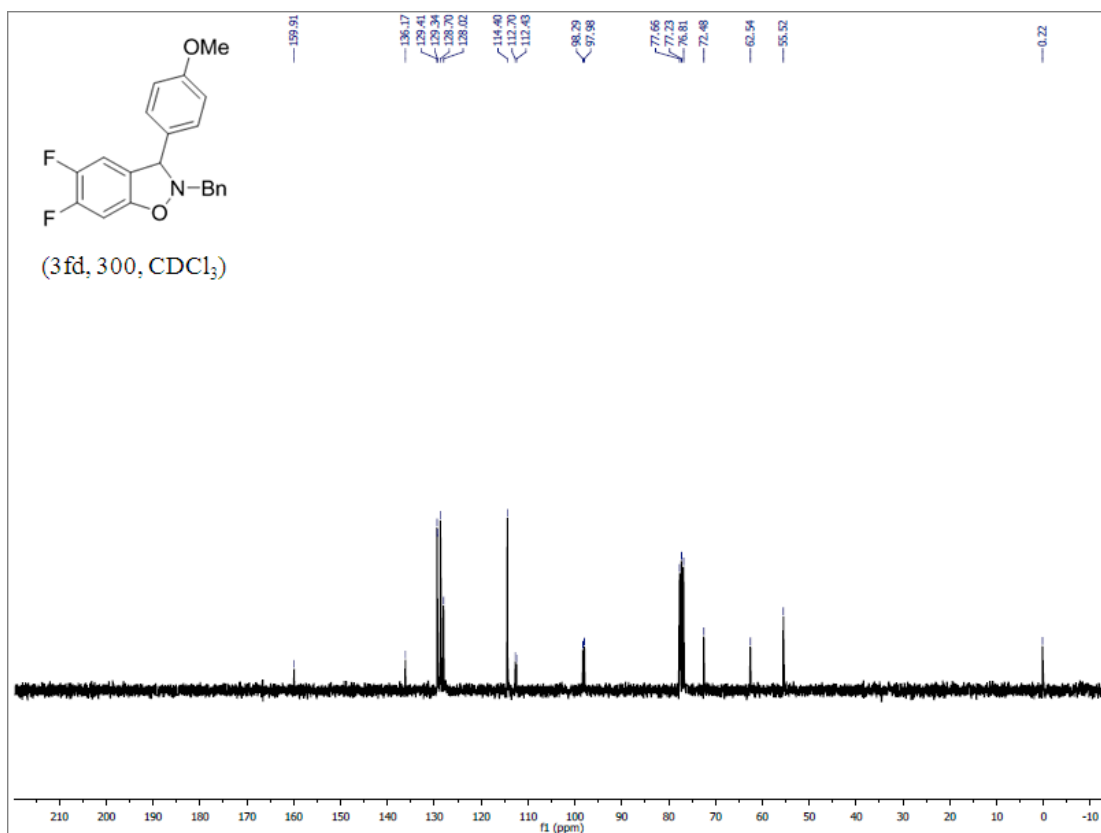

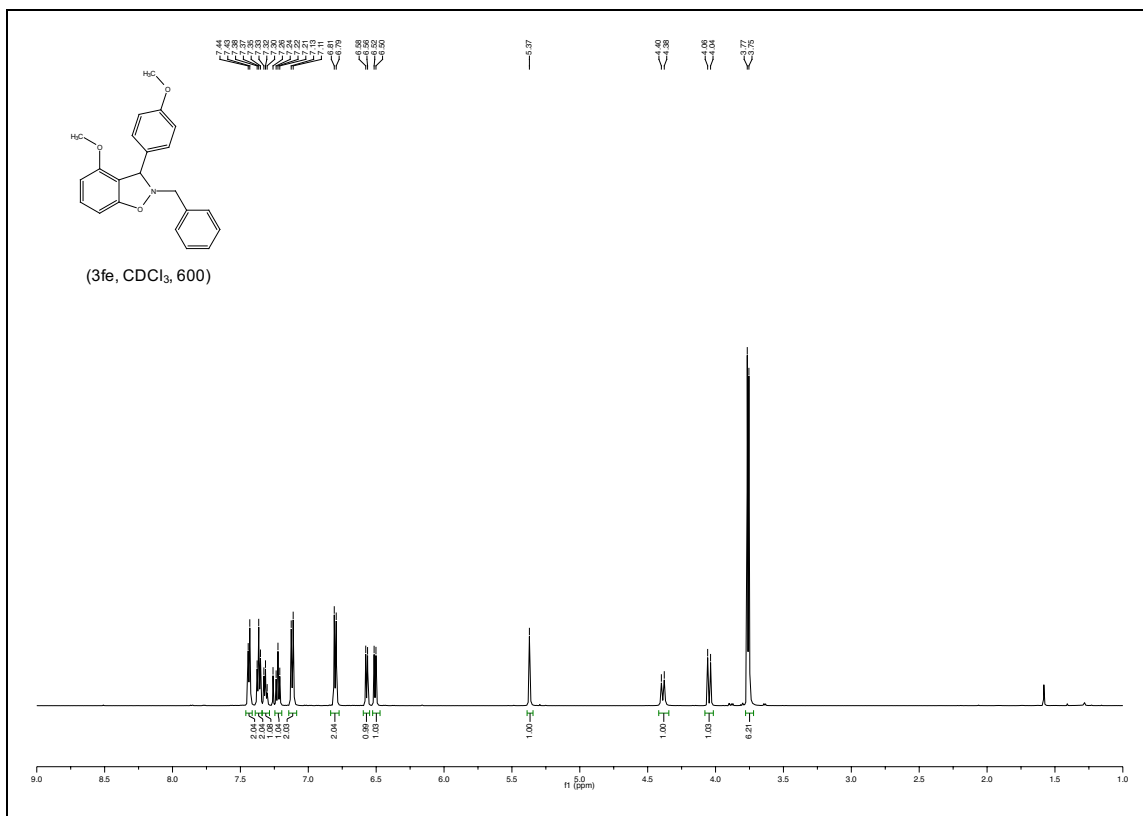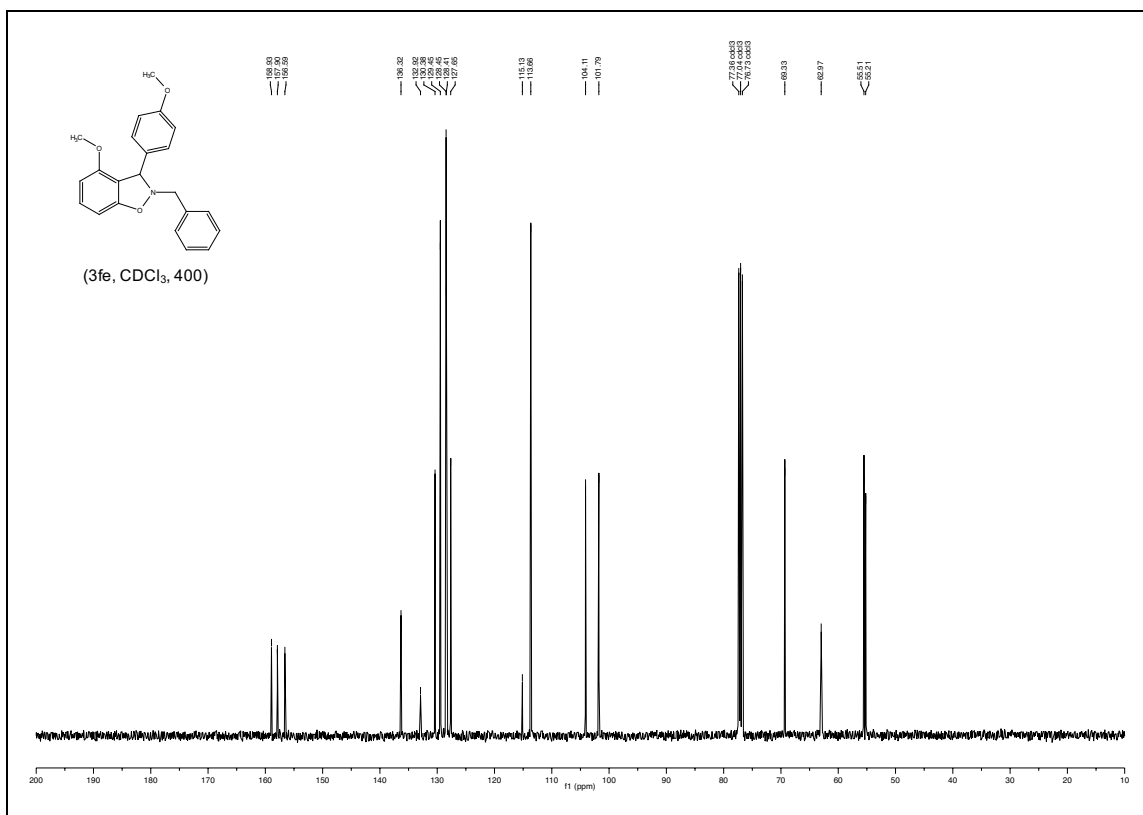

Supplement: NIHMS358076-supplement-1_si_001.pdf [file NIHMS358076-supplement-1_si_001.pdf]
